# Supplementary material for: Estimation of mechanistic parameters in the gas-phase reactions of ozone with alkenes for use in automated mechanism construction
Source: Copernicus journal article supplement (doi:10.5194/acp-2021-1031), 2022-01-03
Supplement: Supplementary file 1 [file acp-2021-1031-supplement.zip]

Supplementary Material for:

**Estimation of mechanistic parameters in the gas-phase reactions of ozone with alkenes for use in automated mechanism construction**

---

**Contents**

|           |                                                      |           |
|-----------|------------------------------------------------------|-----------|
| <b>S1</b> | <b>Fits to determine POZ fragmentation</b>           | <b>2</b>  |
| <b>S2</b> | <b>Determination of endocyclic alkene SCI yields</b> | <b>5</b>  |
| <b>S3</b> | <b>Example Calculations</b>                          | <b>6</b>  |
|           | A: $\alpha$ -pinene                                  | <b>6</b>  |
|           | B: cis-2-pentene                                     | <b>10</b> |
|           | C: 2-methyl-1-pentene                                | <b>13</b> |
|           | D: 2-methyl-1,3-butadiene (Isoprene)                 | <b>16</b> |

**Spreadsheet S1: Database of Primary Carbonyl Yields**

*Note: "carbonyl2" is defined as the most substituted primary carbonyl product*

**Spreadsheet S2: Database of total SCI yields**

**Spreadsheet S3: Database of OH yields**

---

## Section S1: Fits to determine POZ fragmentation

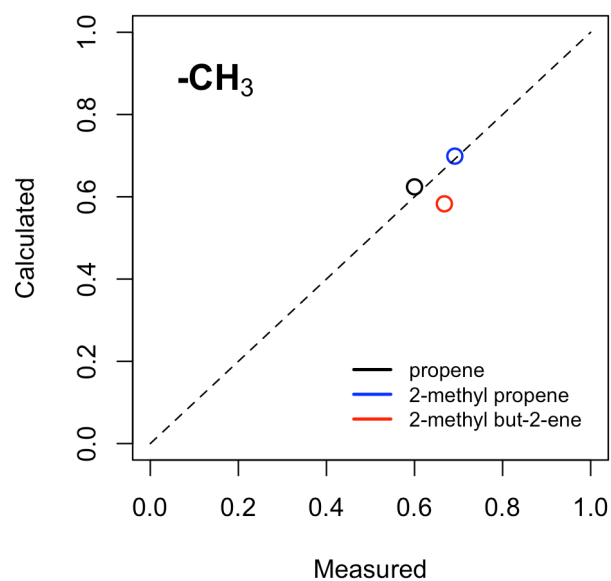

**Figure S1:** Fit to determine group additivity factor for  $-\text{CH}_3$  group in POZ fragmentation.

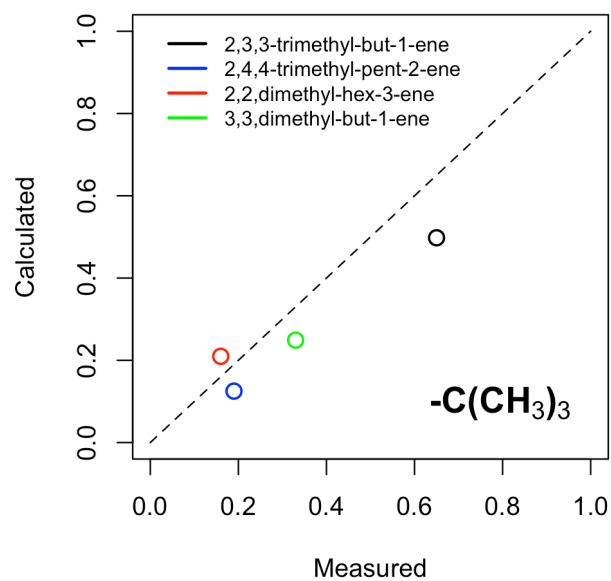

**Figure S2:** Fit to determine group additivity factor for  $-\text{C}(\text{CH}_3)_3$  group in POZ fragmentation.

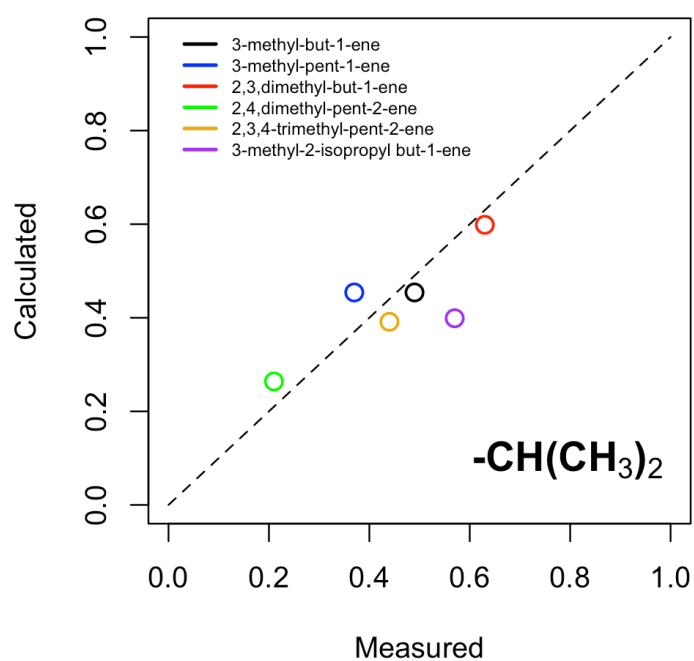

**Figure S3:** Fit to determine group additivity factor for  $-\text{CH}(\text{CH}_3)_2$  group in POZ fragmentation.

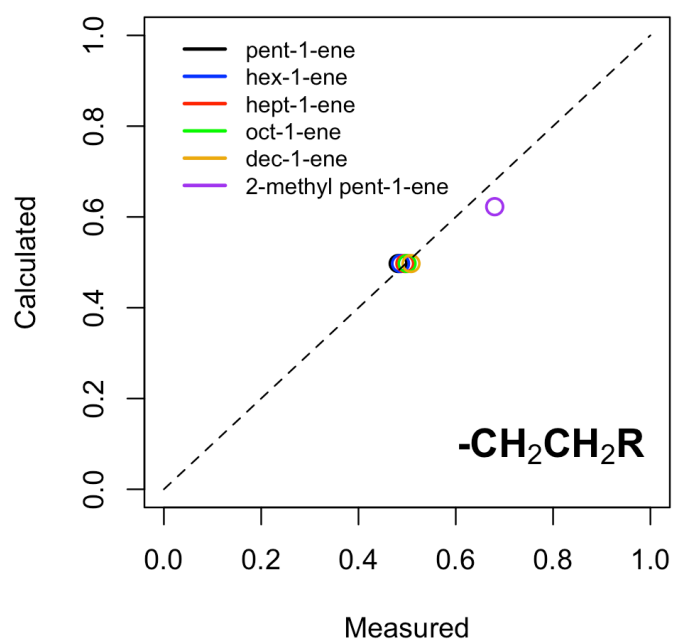

**Figure S4:** Fit to determine group additivity factor for  $-\text{CH}_2\text{CH}_2\text{R}$  group in POZ fragmentation.

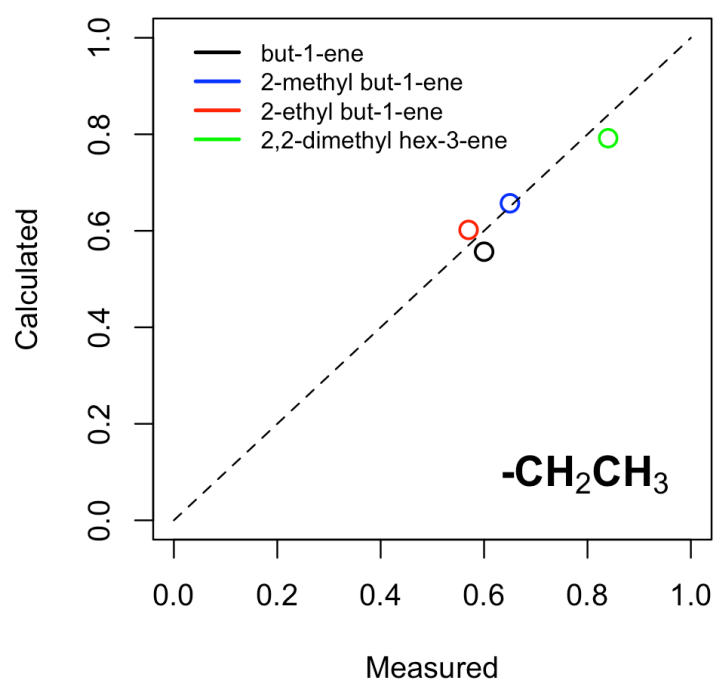

**Figure S5:** Fit to determine group additivity factor for  $-\text{CH}_2\text{CH}_3$  group in POZ fragmentation.

## Section S2: Determination of endocyclic alkene SCI yields

An empirically derived fit (Equation S.E1) to the available data for SCI yields of endocyclic alkenes (cyclo-pentene, -hexene, -heptene, methylcyclohexene,  $\alpha$ -pinene, limonene, b-caryophyllene).

$$\frac{1}{1+580e^{(-C/2)}} \quad (\text{S.E1})$$

where C = carbon number.

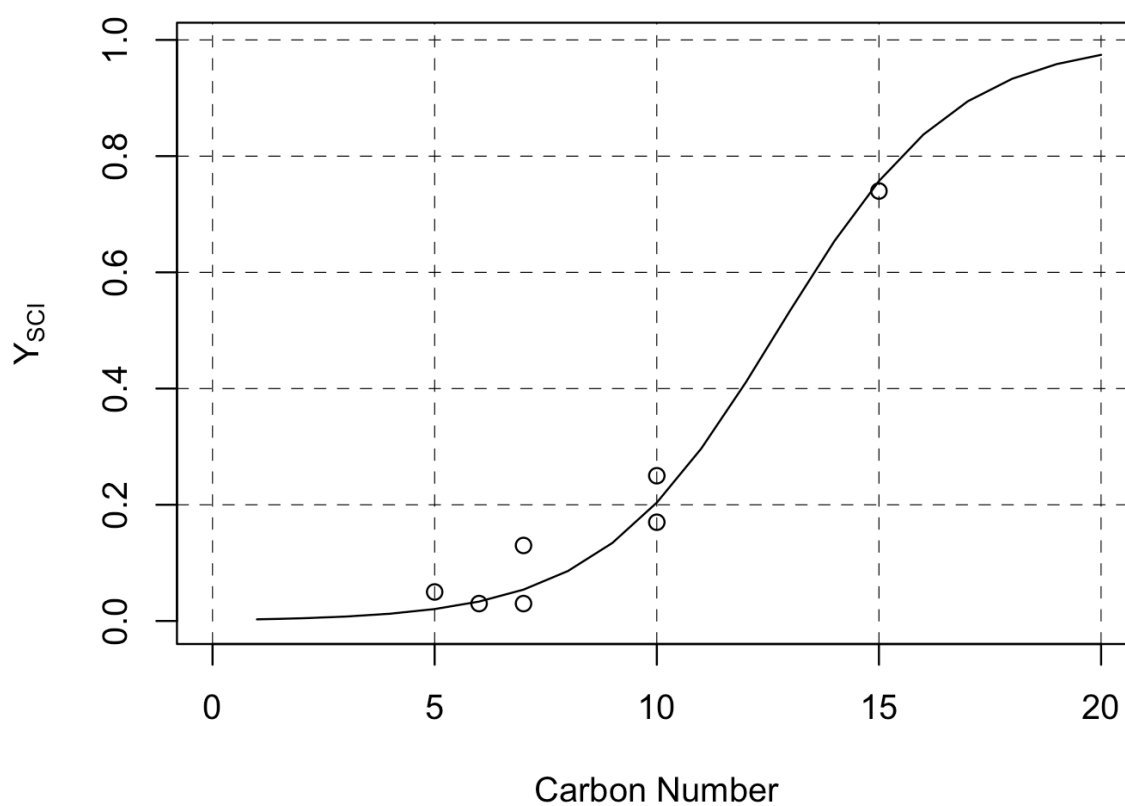

**Figure S6.** Empirically derived fit to measured SCI yields of endocyclic alkenes.

## Section S3: Example Calculations

### A: $\alpha$ -pinene

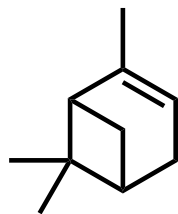

*syn*-Cl1a:

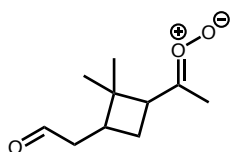

*syn*-Cl2:

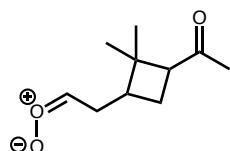

*syn*-Cl1b:

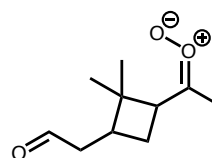

*anti*-Cl2:

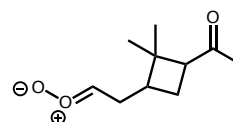

### Cl yields

Treated as  $>\text{C}(\text{CH}_3)=\text{CCH}_2\text{CH}_2<$

$$Y_{\text{Cl1}} = \frac{(0.218) - (0+0) + 1}{2} = 0.61 = 1 - Y_{\text{Cl2}}$$

$$Y_{\text{syn-Cl1a}} = 0.61 * 0.5 = 0.30$$

$$Y_{\text{syn-Cl1b}} = 0.61 * 0.5 = 0.30$$

$$Y_{\text{syn-Cl2}} = 0.39 * 0.5 = 0.20$$

$$Y_{\text{anti-Cl2}} = 0.39 * 0.5 = 0.20$$

\*MCM name ([mcm.york.ac.uk](http://mcm.york.ac.uk))

### Cl Stabilisation

$$S = \frac{1}{1 + 580e^{(-10/2)}} = 0.20$$

**syn-CI1a : Decomposition rate, bimolecular rates and products:**

| <b>Reaction Partner</b> | <b>Rate / <math>\text{cm}^3\text{s}^{-1}</math></b> | <b>Products</b>                                                                         |
|-------------------------|-----------------------------------------------------|-----------------------------------------------------------------------------------------|
| Unimol.                 | $611 \text{ s}^{-1}$                                | 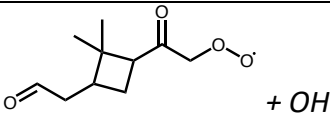 + OH |
| SO <sub>2</sub>         | $1.6 \times 10^{-10}$                               |        |
| RCOOH                   | $3.1 \times 10^{-10}$                               |        |
| NO <sub>2</sub>         | $2 \times 10^{-12}$                                 |        |
| HNO <sub>3</sub>        | $5.4 \times 10^{-10}$                               |        |
| HCl                     | $4.6 \times 10^{-11}$                               |      |

**syn-CI1b : Decomposition rate, bimolecular rates and products:**

| <b>Reaction Partner</b>                             | <b>Rate / <math>\text{cm}^3\text{s}^{-1}</math></b> | <b>Products</b>                                                                          |
|-----------------------------------------------------|-----------------------------------------------------|------------------------------------------------------------------------------------------|
| Unimol.                                             | $14 \text{ s}^{-1}$                                 | 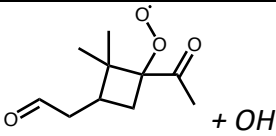 + OH |
| H <sub>2</sub> O<br>(H <sub>2</sub> O) <sub>2</sub> | $9.8 \times 10^{-18}$<br>$1.9 \times 10^{-14}$      |       |
| SO <sub>2</sub>                                     | $1.6 \times 10^{-10}$                               |       |

|                  |                       |                                                                                   |
|------------------|-----------------------|-----------------------------------------------------------------------------------|
| RCOOH            | $3.1 \times 10^{-10}$ | 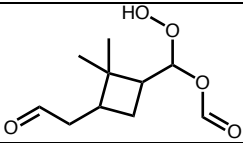 |
| NO <sub>2</sub>  | $2 \times 10^{-12}$   |  |
| HNO <sub>3</sub> | $5.4 \times 10^{-10}$ |  |
| HCl              | $4.6 \times 10^{-11}$ |  |

**syn-Cl2 : Decomposition rate, bimolecular rates and products**

***Decomposition rate, bimolecular rates and products:***

| <b>Reaction Partner</b> | <b>Rate / <math>\text{cm}^3\text{s}^{-1}</math></b> | <b>Products</b>                                                                     |
|-------------------------|-----------------------------------------------------|-------------------------------------------------------------------------------------|
| Unimol.                 | $205 \text{ s}^{-1}$                                | 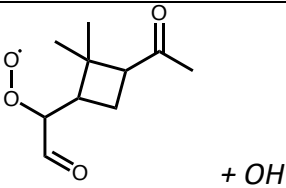 |
| SO <sub>2</sub>         | $2.6 \times 10^{-11}$                               |  |
| RCOOH                   | $2.1 \times 10^{-10}$                               |  |
| NO <sub>2</sub>         | $2 \times 10^{-12}$                                 |  |
| HNO <sub>3</sub>        | $5.4 \times 10^{-10}$                               |  |
| HCl                     | $4.6 \times 10^{-11}$                               |  |



**anti-Cl2: Decomposition rate, bimolecular rates and products**

| <b>Reaction Partner</b>                            | <b>Rate / <math>\text{cm}^{-3}\text{s}^{-1}</math></b> | <b>Products</b>                                                                                                                                                                                                                                                                                          |
|----------------------------------------------------|--------------------------------------------------------|----------------------------------------------------------------------------------------------------------------------------------------------------------------------------------------------------------------------------------------------------------------------------------------------------------|
| Unimol.                                            | $74 \text{ s}^{-1}$                                    | <div>0.4</div> 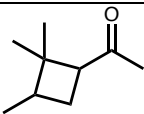 <div>0.2</div>  <div>0.4</div>        |
| $\text{H}_2\text{O} /$<br>$(\text{H}_2\text{O})_2$ | $1.6 \times 10^{-14}$<br>$1.75 \times 10^{-11}$        | <div>0.55</div>  <div>0.40</div>  <div>0.05</div>  |
| $\text{SO}_2$                                      | $1.4 \times 10^{-10} \text{ cm}^{-3}\text{s}^{-1}$     |                                                                                                                                                                                                                       |
| $\text{RCOOH}$                                     | $3.8 \times 10^{-10} \text{ cm}^{-3}\text{s}^{-1}$     |                                                                                                                                                                                                                       |
| $\text{NO}_2$                                      | $2 \times 10^{-12} \text{ cm}^{-3}\text{s}^{-1}$       |                                                                                                                                                                                                                       |
| $\text{HNO}_3$                                     | $5.4 \times 10^{-10} \text{ cm}^{-3}\text{s}^{-1}$     |                                                                                                                                                                                                                       |
| $\text{HCl}$                                       | $4.6 \times 10^{-11} \text{ cm}^{-3}\text{s}^{-1}$     |                                                                                                                                                                                                                       |

## B: cis-2-pentene

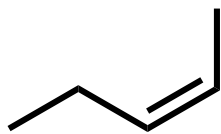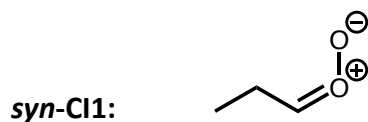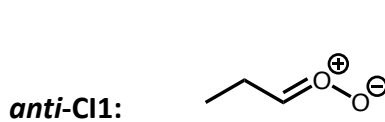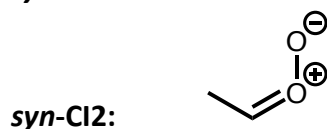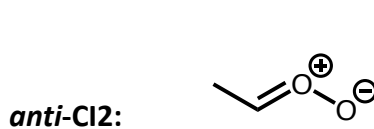

### Cl yields

$$Y_{Cl1} = \frac{(0.218+0)-(0.107+0)+1}{2} = 0.56 = 1 - Y_{Cl2}$$

$$Y_{\text{syn-Cl1}+\text{CH}_3\text{CHO}} = 0.56 * 0.3 = 0.17$$

(*syn:anti* ratio = 0.3:0.7 from *cis*-alkenes)

$$Y_{\text{anti-Cl1}+\text{CH}_3\text{CHO}} = 0.56 * 0.7 = 0.39$$

$$Y_{\text{syn-Cl2}+\text{C}_2\text{H}_5\text{CHO}} = 0.44 * 0.3 = 0.13$$

$$Y_{\text{anti-Cl2}+\text{C}_2\text{H}_5\text{CHO}} = 0.44 * 0.7 = 0.31$$

### Cl Stabilisation

$$(Z)\text{-CH}_3\text{CHOO:} \quad S = 1 - \left[ \left( \frac{4}{8} \right) \times 1.242 \times \left( \frac{5}{4+(5-5)} \right) \right] = 0.22$$

$$(E)\text{-CH}_3\text{CHOO:} \quad S = 1 - \left[ \left( \frac{4}{8} \right) \times 0.95 \times \left( \frac{5}{4+(5-3)} \right) \right] = 0.60$$

$$(Z)\text{-CH}_3\text{CH}_2\text{CHOO:} \quad S = 1 - \left[ \left( \frac{5}{8} \right) \times 1.242 \times \left( \frac{5}{5+(5-5)} \right) \right] = 0.22$$

$$(E)\text{-CH}_3\text{CH}_2\text{CHOO:} \quad S = 1 - \left[ \left( \frac{5}{8} \right) \times 0.95 \times \left( \frac{5}{5+(5-3)} \right) \right] = 0.58$$

### syn-Cl1: Decomposition rate, bimolecular rates and products

| Reaction Partner | Rate / $\text{cm}^3\text{s}^{-1}$ | Products                                                                                 |
|------------------|-----------------------------------|------------------------------------------------------------------------------------------|
| Unimol.          | $205 \text{ s}^{-1}$              | 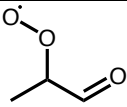 + OH |
| SO <sub>2</sub>  | $2.6 \times 10^{-11}$             |       |

|                  |                       |  |
|------------------|-----------------------|--|
| RCOOH            | $2.1 \times 10^{-10}$ |  |
| NO <sub>2</sub>  | $2 \times 10^{-12}$   |  |
| HNO <sub>3</sub> | $5.4 \times 10^{-10}$ |  |
| HCl              | $4.6 \times 10^{-11}$ |  |

**anti-Cl1: Decomposition rate, bimolecular rates and products**

| Reaction Partner                                   | Rate / $\text{cm}^3\text{s}^{-1}$               | Products                                                                                          |
|----------------------------------------------------|-------------------------------------------------|---------------------------------------------------------------------------------------------------|
| Unimol.                                            | $74 \text{ s}^{-1}$                             | 0.4 $\text{C}_2\text{H}_6 + \text{CO}_2$<br>0.2  + CO<br>0.4  + HO <sub>2</sub> + CO <sub>2</sub> |
| H <sub>2</sub> O / (H <sub>2</sub> O) <sub>2</sub> | $1.6 \times 10^{-14}$<br>$1.75 \times 10^{-11}$ | <br>0.55<br><br>0.40<br><br>0.05<br>                                                              |
| SO <sub>2</sub>                                    | $1.4 \times 10^{-10}$                           |                                                                                                   |
| RCOOH                                              | $3.8 \times 10^{-10}$                           |                                                                                                   |
| NO <sub>2</sub>                                    | $2 \times 10^{-12}$                             |                                                                                                   |
| HNO <sub>3</sub>                                   | $5.4 \times 10^{-10}$                           |                                                                                                   |
| HCl                                                | $4.6 \times 10^{-11}$                           |                                                                                                   |

**syn-Cl2: Decomposition rate, bimolecular rates and products**

| Reaction Partner | Rate / $\text{cm}^3\text{s}^{-1}$ | Products |
|------------------|-----------------------------------|----------|
|------------------|-----------------------------------|----------|

|                  |                       |                                                                                        |
|------------------|-----------------------|----------------------------------------------------------------------------------------|
| Unimol.          | $136 \text{ s}^{-1}$  | 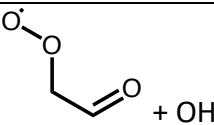 + OH |
| SO <sub>2</sub>  | $2.6 \times 10^{-11}$ |       |
| RCOOH            | $2.1 \times 10^{-10}$ |       |
| NO <sub>2</sub>  | $2 \times 10^{-12}$   |       |
| HNO <sub>3</sub> | $5.4 \times 10^{-10}$ |       |
| HCl              | $4.6 \times 10^{-11}$ |       |

**anti-Cl2: Decomposition rate, bimolecular rates and products**

| <b>Reaction Partner</b>                               | <b>Rate / <math>\text{cm}^3\text{s}^{-1}</math></b> | <b>Products</b>                                                                                                                                                                                                                                                                  |
|-------------------------------------------------------|-----------------------------------------------------|----------------------------------------------------------------------------------------------------------------------------------------------------------------------------------------------------------------------------------------------------------------------------------|
| Unimol.                                               | $53 \text{ s}^{-1}$                                 | 0.4 $\text{CH}_4 + \text{CO}_2$<br>0.2 $\text{CH}_3\text{OH} + \text{CO}$<br>0.4 $\text{CH}_3\text{O}_2 + \text{HO}_2 + \text{CO}_2$                                                                                                                                             |
| H <sub>2</sub> O /<br>(H <sub>2</sub> O) <sub>2</sub> | $2.3 \times 10^{-14}$<br>$2.7 \times 10^{-11}$      | 0.55 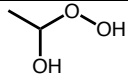<br>0.40 <br>0.05  |
| SO <sub>2</sub>                                       | $1.4 \times 10^{-10}$                               |                                                                                                                                                                                               |
| RCOOH                                                 | $3.8 \times 10^{-10}$                               |                                                                                                                                                                                               |
| NO <sub>2</sub>                                       | $2 \times 10^{-12}$                                 |                                                                                                                                                                                               |
| HNO <sub>3</sub>                                      | $5.4 \times 10^{-10}$                               |                                                                                                                                                                                               |
| HCl                                                   | $4.6 \times 10^{-11}$                               |                                                                                                                                                                                               |

## C: 2-methyl-1-pentene

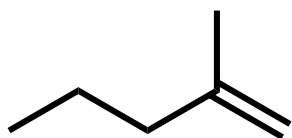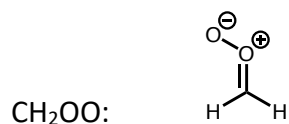

syn-Cl1:

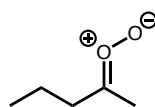

anti-Cl1:

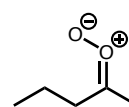

## CI yields

$$Y_{Cl1} = \frac{(0.218-0)+1}{2} = 0.61 = 1 - Y_{Cl2}$$

$$Y_{\text{syn-Cl1}+\text{HCHO}} = 0.61 \times 0.5 = 0.30$$

$$Y_{\text{anti-Cl1}+\text{HCHO}} = 0.61 \times 0.5 = 0.30$$

$$Y_{\text{CH}_2\text{OO}+\text{CH}_3(\text{CH}_2)_2\text{C}(\text{O})\text{CH}_3} = 1 - 0.61 = 0.39$$

## CI Stabilisation

$$\text{CH}_2\text{OO:} \quad S = 1 - \left[ \left( \frac{3}{9} \right) \times 0.95 \times \left( \frac{5}{3+(5-3)} \right) \right] = 0.68$$

$$(Z)\text{-CH}_3\text{COO}(\text{CH}_2)_2\text{CH}_3: \quad S = 1 - \left[ \left( \frac{7}{9} \right) \times 1.242 \times \left( \frac{5}{7+(5-5)} \right) \right] = 0.31$$

$$(E)\text{-CH}_3\text{COO}(\text{CH}_2)_2\text{CH}_3: \quad S = 1 - \left[ \left( \frac{7}{9} \right) \times 0.95 \times \left( \frac{5}{7+(5-3)} \right) \right] = 0.59$$

## CH<sub>2</sub>OO: Decomposition rate, bimolecular rates and products

| Reaction Partner                                    | Rate / cm <sup>3</sup> s <sup>-1</sup>             | Products                                           |
|-----------------------------------------------------|----------------------------------------------------|----------------------------------------------------|
| H <sub>2</sub> O<br>(H <sub>2</sub> O) <sub>2</sub> | 8.7 × 10 <sup>-16</sup><br>1.4 × 10 <sup>-12</sup> | <div>0.55 </div> <div>0.40 </div> <div>0.05 </div> |
| SO <sub>2</sub>                                     | 3.7 × 10 <sup>-11</sup>                            |                                                    |

|                  |                       |                                                                                   |
|------------------|-----------------------|-----------------------------------------------------------------------------------|
| RCOOH            | $1.2 \times 10^{-10}$ | 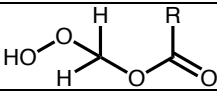 |
| NO <sub>2</sub>  | $3 \times 10^{-12}$   |  |
| HNO <sub>3</sub> | $5.4 \times 10^{-10}$ |  |
| HCl              | $4.6 \times 10^{-11}$ |  |
|                  |                       |                                                                                   |

**syn-Cl1: Decomposition rate, bimolecular rates and products**

| <b>Reaction Partner</b> | <b>Rate / <math>\text{cm}^3\text{s}^{-1}</math></b> | <b>Products</b>                                                                        |
|-------------------------|-----------------------------------------------------|----------------------------------------------------------------------------------------|
| Unimol.                 | $433 \text{ s}^{-1}$                                | 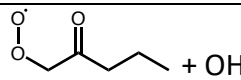 + OH |
| SO <sub>2</sub>         | $1.6 \times 10^{-10}$                               |       |
| RCOOH                   | $3.1 \times 10^{-10}$                               |      |
| NO <sub>2</sub>         | $2 \times 10^{-12}$                                 |     |
| HNO <sub>3</sub>        | $5.4 \times 10^{-10}$                               |     |
| HCl                     | $4.6 \times 10^{-11}$                               |     |

**anti-Cl1: Decomposition rate, bimolecular rates and products**

| <b>Reaction Partner</b> | <b>Rate / <math>\text{cm}^3\text{s}^{-1}</math></b> | <b>Products</b>                                                                          |
|-------------------------|-----------------------------------------------------|------------------------------------------------------------------------------------------|
| Unimol.                 | $689 \text{ s}^{-1}$                                | 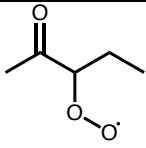 + OH |
| SO <sub>2</sub>         | $1.6 \times 10^{-10}$                               |       |

|                  |                       |                                                                                   |
|------------------|-----------------------|-----------------------------------------------------------------------------------|
| RCOOH            | $3.1 \times 10^{-10}$ | 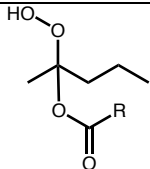 |
| NO <sub>2</sub>  | $2 \times 10^{-12}$   |  |
| HNO <sub>3</sub> | $5.4 \times 10^{-10}$ |  |
| HCl              | $4.6 \times 10^{-11}$ |  |

## D: 2-methyl-1,3-butadiene (Isoprene)

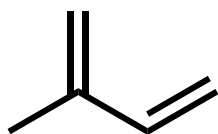

Reaction at terminal double bond: Branching = 0.6 (from Jenkin et al., 2020)

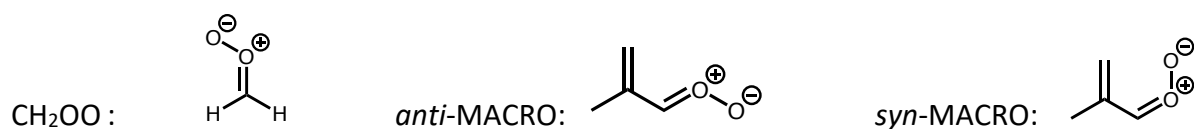

### CI yields

$$Y_{CI1} = \frac{(-0.28) - (0) + 1}{2} = 0.36 = 1 - Y_{CI2}$$

$$Y_{\text{anti-MACRO}+\text{HCHO}} = 0.36 \times 0.8 = 0.29 \quad (\text{syn:anti formed with a ratio of 0.2:0.8} - \text{Kuwata et al., 2005})$$

$$Y_{\text{syn-MACRO}+\text{HCHO}} = 0.36 \times 0.2 = 0.07$$

$$Y_{\text{CH}_2\text{OO}+\text{MACR}} = 1 - 0.36 = 0.64$$

### CI stabilisation

$$\text{CH}_2\text{OO:} \quad S = 1 - \left[ \left( \frac{3}{8} \right) \times 0.95 \times \left( \frac{5}{3+(5-3)} \right) \right] = 0.64$$

$$(Z)\text{-MACRO} \quad S = 1 - \left[ \left( \frac{6}{8} \right) \times 1.242 \times \left( \frac{5}{6+(5-5)} \right) \right] = 0.22$$

$$(E)\text{-MACRO:} \quad S = 1 - \left[ \left( \frac{6}{8} \right) \times 0.95 \times \left( \frac{5}{6+(5-3)} \right) \right] = 0.55$$

### CH<sub>2</sub>OO: Decomposition rate, bimolecular rates and products

See C: 2-methyl-1-pentene

### anti-MACRO (E-(C(CH<sub>3</sub>)=CH<sub>2</sub>)CHOO): Decomposition rate, bimolecular rates and products

| Reaction Partner                                   | Rate / cm <sup>3</sup> s <sup>-1</sup>             | Products                                                                        |
|----------------------------------------------------|----------------------------------------------------|---------------------------------------------------------------------------------|
| Unimol.                                            | 30 s <sup>-1</sup>                                 | 0.4  + CO <sub>2</sub><br>0.2  + CO<br>0.4  + HO <sub>2</sub> + CO <sub>2</sub> |
| H <sub>2</sub> O / (H <sub>2</sub> O) <sub>2</sub> | 1.4 × 10 <sup>-16</sup><br>2.7 × 10 <sup>-13</sup> | <br>0.55                                                                        |



|                  |                       |                                                                                                                                                                                                     |
|------------------|-----------------------|-----------------------------------------------------------------------------------------------------------------------------------------------------------------------------------------------------|
|                  |                       | <div>0.40</div> 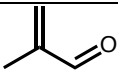 <div>0.05</div>  |
| SO <sub>2</sub>  | $1.4 \times 10^{-10}$ |                                                                                                                    |
| RCOOH            | $3.8 \times 10^{-10}$ |                                                                                                                    |
| NO <sub>2</sub>  | $2 \times 10^{-12}$   |                                                                                                                    |
| HNO <sub>3</sub> | $5.4 \times 10^{-10}$ |                                                                                                                    |
| HCl              | $4.6 \times 10^{-11}$ |                                                                                                                    |

**syn-MACRO** (*Z*-(C(CH<sub>3</sub>)=CH<sub>2</sub>)CHOO): *Decomposition rate, bimolecular rates and products*

| Reaction Partner | Rate / $\text{cm}^3\text{s}^{-1}$               | Products                                                                                                                                                                                                              |
|------------------|-------------------------------------------------|-----------------------------------------------------------------------------------------------------------------------------------------------------------------------------------------------------------------------|
| Unimol.          | $13,400 \text{ s}^{-1}$                         | <div>0.5</div> 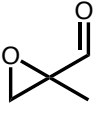 <div>0.5</div>  <div>+HCO</div> |
| SO <sub>2</sub>  | $2.6 \times 10^{-11} \text{ cm}^3\text{s}^{-1}$ |                                                                                                                                    |
| RCOOH            | $2.1 \times 10^{-10} \text{ cm}^3\text{s}^{-1}$ |                                                                                                                                    |
| NO <sub>2</sub>  | $2 \times 10^{-12} \text{ cm}^3\text{s}^{-1}$   |                                                                                                                                    |
| HNO <sub>3</sub> | $5.4 \times 10^{-10} \text{ cm}^3\text{s}^{-1}$ |                                                                                                                                    |
| HCl              | $4.6 \times 10^{-11} \text{ cm}^3\text{s}^{-1}$ |                                                                                                                                    |

Reaction at disubstituted double bond: Branching = 0.4 (from Jenkin et al., 2020)

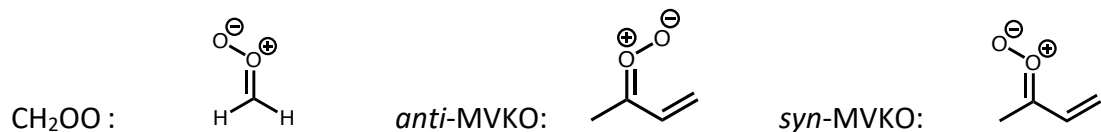

### CI yields

$$Y_{\text{Cl1}} = \frac{(0.218 + -0.28) + 1}{2} = 0.47 = 1 - Y_{\text{Cl2}}$$

$$Y_{\text{anti-MVKO+HCHO}} = 0.47 \times 0.5 = 0.23$$

$$Y_{\text{syn-MVKO+HCHO}} = 0.47 \times 0.5 = 0.23$$

$$Y_{\text{CH}_2\text{OO+MVK}} = 1 - 0.47 = 0.53$$

### CI stabilisation

$$\text{CH}_2\text{OO:} \quad S = 1 - \left[ \left( \frac{3}{8} \right) \times 0.95 \times \left( \frac{5}{3 + (5-3)} \right) \right] = 0.64$$

$$\text{anti-MVKO:} \quad S = 1 - \left[ \left( \frac{6}{8} \right) \times 1.242 \times \left( \frac{5}{6 + (5-5)} \right) \right] = 0.22$$

$$\text{syn-MVKO:} \quad S = 1 - \left[ \left( \frac{6}{8} \right) \times 1.242 \times \left( \frac{5}{6 + (5-5)} \right) \right] = 0.22$$

### CH<sub>2</sub>OO: Decomposition rate, bimolecular rates and products

See C: 2-methyl-1-pentene

### anti-MVKO (Z-(CH=CH<sub>2</sub>)(CH<sub>3</sub>)COO): Decomposition rate, bimolecular rates and products

| Reaction Partner | Rate / cm <sup>3</sup> s <sup>-1</sup>                  | Products                                                                                                                                                                            |
|------------------|---------------------------------------------------------|-------------------------------------------------------------------------------------------------------------------------------------------------------------------------------------|
| Unimol.          | 13,400 s <sup>-1</sup>                                  | 0.5 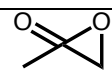<br>0.5  |
| SO <sub>2</sub>  | 2.6 × 10 <sup>-11</sup> cm <sup>3</sup> s <sup>-1</sup> |                                                                                                  |
| RCOOH            | 2.1 × 10 <sup>-10</sup> cm <sup>3</sup> s <sup>-1</sup> |                                                                                                  |
| NO <sub>2</sub>  | 2 × 10 <sup>-12</sup> cm <sup>3</sup> s <sup>-1</sup>   |                                                                                                  |

|                  |                                                    |                                                                                   |
|------------------|----------------------------------------------------|-----------------------------------------------------------------------------------|
| HNO <sub>3</sub> | $5.4 \times 10^{-10} \text{ cm}^{-3}\text{s}^{-1}$ | 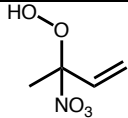 |
| HCl              | $4.6 \times 10^{-11} \text{ cm}^{-3}\text{s}^{-1}$ |  |

**syn-MVKO (*E*-(CH=CH<sub>2</sub>)(CH<sub>3</sub>)COO): Decomposition rate, bimolecular rates and products**

| <b>Reaction Partner</b> | <b>Rate / <math>\text{cm}^{-3}\text{s}^{-1}</math></b> | <b>Products</b>                                                                        |
|-------------------------|--------------------------------------------------------|----------------------------------------------------------------------------------------|
| Unimol.                 | $50 \text{ s}^{-1}$                                    | 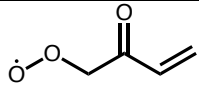 + OH |
| SO <sub>2</sub>         | $2.6 \times 10^{-11} \text{ cm}^{-3}\text{s}^{-1}$     |       |
| RCOOH                   | $2.1 \times 10^{-10} \text{ cm}^{-3}\text{s}^{-1}$     |      |
| NO <sub>2</sub>         | $2 \times 10^{-12} \text{ cm}^{-3}\text{s}^{-1}$       |     |
| HNO <sub>3</sub>        | $5.4 \times 10^{-10} \text{ cm}^{-3}\text{s}^{-1}$     |     |
| HCl                     | $4.6 \times 10^{-11} \text{ cm}^{-3}\text{s}^{-1}$     |     |
