# Supplementary material for: Estimation of mechanistic parameters in the gas-phase reactions of ozone with alkenes for use in automated mechanism construction
Source: Copernicus journal article supplement (doi:10.5194/acp-2021-1031), 2022-01-03
Supplement: Supplementary file 2 [file S2_SCI_yields.xlsx]

## Sheet: References
Reference
Ahrens et al., 2014	Ahrens, J., Carlsson, P. T. M., Hertl, N., Olzmann, M., Pfeifle, M., Wolf, J. L., and Zeuch, T.: Infrared Detection of Criegee Intermediates Formed during the Ozonolysis of β-pinene and Their Reactivity towards Sulfur Dioxide, Angew. Chem., 53, 715–719, 2014.
Alam et al., 2011	Alam, M. S., Camredon, M., Rickard, A. R., Carr, T., Wyche, K. P., Hornsby, K. E., Monks, P. S., and Bloss, W. J.: Total radical yields from tropospheric ethene ozonolysis, Phys. Chem. Chem. Phys., 13, 11002–11015, 2011.
Berndt et al., 2012	Berndt, T., Jokinen, T., Mauldin III, R. L., Petaja, T., Herrmann, H., Junninen, H., ... & Sipila, M: Gas-phase ozonolysis of selected olefins: The yield of stabilized Criegee intermediate and the reactivity toward SO2. The Journal of Physical Chemistry Letters, 3(19), 2892-2896, 2012.
Berndt et al., 2014a	Berndt, T., Voigtländer, J., Stratmann, F., Junninen, H., Mauldin III, R. L., Sipilä, M., Kulmala, M., and Herrmann, H.: Competing atmospheric reactions of CH2OO with SO2 and water vapour, Phys. Chem. Chem. Phys., 16, 19130–19136, 2014.
Berndt et al., 2014b	Berndt, T., Jokinen, T., Sipilä, M., Mauldin III, R. L., Herrmann, H., Stratmann, F., Junninen, H., and Kulmala, M.: H2SO4 formation from the gas-phase reaction of stabilized Criegee intermediates with SO2: Influence of water vapour content and temperature, Atmos. Environ., 89, 603-612, 2014b.
Cox and Penkett, 1972	Cox, R. A., & Penkett, S. A.: Aerosol formation from sulphur dioxide in the presence of ozone and olefinic hydrocarbons. Journal of the Chemical Society, Faraday Transactions 1: Physical Chemistry in Condensed Phases, 68, 1735-1753, 1972.
Hasson et al., 2001a	Hasson, A. S., Orzechowska, G., and Paulson, S. E.: Production of stabilized Criegee intermediates and peroxides in the gas phase ozonolysis of alkenes 1. Ethene, trans-2-butene, and 2,3- dimethyl-2-butene, J. Geophys. Res., 106, 34131–34142, 2001.
Hasson et al., 2001b	Hasson, A. S., Ho, A. W., Kuwata, K., and Paulson, S. E.: Production of stabilized Criegee intermediates and peroxides in the gas phase ozonolysis of alkenes 2. Asymmetric and biogenic alkenes, J. Geophys. Res., 106, 34143–34153, 2001b.
Hatakeyama et al., 1984	Hatakeyama, S., Kobayashi, H., and Akimoto, H.: Gas-phase oxidation of sulfur dioxide in the ozone-olefin reactions, J. Phys. Chem. 88, 4736-4739, 1984.
Horie and Moortgat, 1991	Horie, O., & Moortgat, G. K.: Decomposition pathways of the excited Criegee intermediates in the ozonolysis of simple alkenes. Atmospheric Environment. Part A. General Topics, 25(9), 1881-1896, 1991.
Kan et al., 1981	Kan C. S. , Su, F., Calvert J. G., and Shaw J. H.: Mechanism of the ozone-ethene reaction in dilute N2/O2 mixtures near 1-atm pressure. The Journal of Physical Chemistry, 85, 2359-2363, 1981.
Leungsakul et al., 2005	Leungsakul, S., Jaoui, M., & Kamens, R. M.: Kinetic mechanism for predicting secondary organic aerosol formation from the reaction of d-limonene with ozone. Environmental science & technology, 39(24), 9583-9594, 2016.
Neeb et al., 1997	Neeb, P., Sauer, F., Horie, O., and Moortgat, G. K. Formation of hydroxymethyl hydroperoxide and formic acid in alkene ozonolysis in the presence of water vapour, Atmos. Environ., 31, 1417-1423, 1997.
Neeb et al., 1998a	Neeb, P., Kolloff, A., Koch, S., & Moortgat, G. K.: Rate constants for the reactions of methylvinyl ketone, methacrolein, methacrylic acid, and acrylic acid with ozone. International journal of chemical kinetics, 30(10), 769-776, 1998.
Neeb et al., 1998b	Neeb, P., Horie, O., & Moortgat, G. K. (1998). The ethene− ozone reaction in the gas phase. The Journal of Physical Chemistry A, 102(34), 6778-6785.
Newland et al., 2015a	Newland, M. J., Rickard, A. R., Alam, M. S., Vereecken, L., Muñoz, A., Ródenas, M., and Bloss, W. J.: Kinetics of stabilised Criegee intermediates derived from alkene ozonolysis: reactions with SO2, H2O and decomposition under boundary layer conditions, Phys. Chem. Chem. Phys., 17, 4076-4088, 2015.
Newland et al., 2015b	Newland, M. J., Rickard, A. R., Vereecken, L., Muñoz, A., Ródenas, M., & Bloss, W. J.: Atmospheric isoprene ozonolysis: impacts of stabilised Criegee intermediate reactions with SO 2, H 2 O and dimethyl sulfide. Atmospheric Chemistry and Physics, 15(16), 9521-9536, 2015.
Newland et al., 2018	Newland, M. J., Rickard, A. R., Sherwen, T., Evans, M. J., Vereecken, L., Muñoz, A., Ródenas, M., and Bloss, W. J.: The atmospheric impacts of monoterpene ozonolysis on global stabilised Criegee intermediate budgets and SO2 oxidation: experiment, theory and modelling, Atmos. Chem. Phys., 18, 6095-6120, 2018.
Newland et al., 2020	Newland, M. J., Nelson B. S., Muñoz, A., Ródenas, M., Vera, T., Tarrega, J., and Rickard, A. R.: Trends in stabilisation of Criegee intermediates from alkene ozonolysis, Phys. Chem. Chem. Phys., 22, 13698-13706, 2020.
Niki et al., 1981	Niki, H., Maker, P. D., Savage, C. M., & Breitenbach, L. P. : A FT IR study of a transitory product in the gas-phase ozone-ethylene reaction. The Journal of Physical Chemistry, 85(8), 1024-1027, 1981.
Niki et al., 1977	Niki, H., Maker, P. D., Savage, C. M., & Breitenbach, L. P. :Fourier transform IR spectroscopic observation of propylene ozonide in the gas phase reaction of ozone—cis-2-butene—formaldehyde. Chemical Physics Letters, 46(2), 327-330, 1977.
Nguyen et al., 2009a	Nguyen, T. L., Winterhalter, R., Moortgat, G., Kanawati, B., Peeters, J., and Vereecken, L.: The gas-phase ozonolysis of b-caryophyllene (C15H24). Part II: A theoretical study, Phys. Chem. Chem. Phys., 11, 4173-4183, 2009a.
Nguyen et al., 2009b	Nguyen, T. L., Peeters, J., and Vereecken, L.: Theoretical study of the gas-phase ozonolysis of b-pinene (C10H16), Phys. Chem. Chem. Phys., 11, 5643-5656, 2009b.
Nguyen et al., 2016	Nguyen, T. B., Tyndall, G. S., Crounse, J. D., Teng, A. P., Bates, K. H., Schwantes, R. H., Coggon, M. M., Zhang, L., Feiner, P., and Miller, D. O.: Atmospheric fates of Criegee intermediates in the ozonolysis of isoprene, Phys. Chem. Chem. Phys., 18, 10241– 10254, 2016.
Paulson and Seinfeld 1992	Paulson, S. E., & Seinfeld, J.: Atmospheric photochemical oxidation of 1-octene: OH, O3, and O (3P) reactions. Environmental Science & Technology, 26(6), 1992. 1165-1173.
Rickard et al., 1999	Rickard, A. R., Johnson, D., McGill, C. D., and Marston, G. OH Yields in the Gas-Phase reactions of Ozone with Alkenes, J. Phys. Chem. A, 103, 7656–7664, 1999.
Sipilä et al., 2014	Sipilä, M., Jokinen, T., Berndt, T., Richters, S., Makkonen, R., Donahue, N. M., Mauldin III, R. L., Kurtén, T., Paasonen, P., Sarnela, N., Ehn, M., Junninen, H., Rissanen, M. P., Thornton, J., Stratmann, F., Herrmann, H., Worsnop, D. R., Kulmala, M., Kerminen, V.-M., and Petäjä, T.: Reactivity of stabilized Criegee intermediates (sCIs) from isoprene and monoterpene ozonolysis toward SO2 and orga…
Su et al., 1980	Su F, Calvert JG, Shaw JH. A FT IR spectroscopic study of the ozone-ethene reaction mechanism in oxygen-rich mixtures. The Journal of Physical Chemistry. 84, 239-246, 1980.
Taipale et al., 2014	Taipale, R., Sarnela, N., Rissanen, M. P., Junninen, H., Rantala, P., Korhonen, F., ... & Sipilä, M. J.: New instrument for measuring atmospheric concentrations of non-OH oxidants of SO2. Boreal Environment Research. 2014.
Winterhalter et al., 2000	Winterhalter, R., Neeb, P., Grossmann, D., Kolloff, A., Horie, O. and Moortgat, G..: Products and mechanism of the gas phase reaction of ozone with β-pinene. Journal of Atmospheric Chemistry, 35(2), 165-197, 2000.
Winterhalter et al., 2009	Winterhalter, R., Herrmann, F., Kanawati, B., Nguyen, T. L., Peeters, J., Vereecken, L., and Moortgat, G.: The gas-phase ozonolysis of B-caryophyllene (C15H24). Part I: an experimental study, Phys. Chem. Chem. Phys., 11, 4152-4172, 2009.

## Sheet: Monoalkenes
molecule	measured SCI yield	absolute error	criegee	Valid	Assumptions	ref	Details	Notes
ethene	0.43	0.02	both	T		Newland et al., 2020	SO2 removal
ethene	0.38	NA	both	T		Su et al., 1980	HMF (FTIR,wrong identification, was HPMF) yield from HCHO + SCI
ethene	0.37	0.02	both	T		Kan et al., 1981	HMF (FTIR,wrong identification, was HPMF) yield from HCHO + SCI
ethene	0.35	0.05	both	T		Niki et al., 1981	HMF (FTIR,wrong identification, was HPMF) yield from HCHO + SCI
ethene	0.39	0.053	both	T		Hatakeyama et al., 1984	H2SO4 (GC) yield from SO2 + SCI
ethene	0.47	NA	both	T		Horie and Moortgat, 1991	FTIR - Model
ethene	0.42	NA	both	T		Neeb et al., 1997	HMHP (HPLC) yield from H2O + SCI
ethene	0.5	0.04	both	F		Neeb et al., 1998b	FTIR - Stoichiometry
ethene	0.54	0.12	both	F		Alam et al., 2011	HCHO (FTIR) yield from CO + SCI	CO + SCI has been shown to be negligibly slow Vereecken et al. (2015). Additional HCHO maybe comes from CH2OO + H2O (even at low RH).
ethene	0.37	0.04	both	T		Newland et al., 2015a	SO2 removal
ethene	0.38	0.11	both	T		Hasson et al., 2001a	HMHP (HPLC-fluorescence) yield from H2O + SCI
ethene	0.39	0.11	both	T		Hasson et al., 2001a	HPMF (HPLC-fluorescence) yield from HCOOH + SCI
ethene	0.4	0.18	both	T		Berndt et al., 2014a	H2SO4 (CI-APi-TOFms) yield from SO2 + SCI with OH scavenger
propene	0.254	0.023	both	T		Hatakeyama et al., 1984	H2SO4 (GC) yield from SO2 + SCI
propene	0.44	NA	both	F		Horie and Moortgat, 1991	Inferred from combination of ethene and trans-but-2-ene end products
propene	0.14	NA	CI2	F		Neeb et al., 1997	HMHP (HPLC) yield from H2O + SCI
propene	0.22	NA	both	F	Total SCI yield assumes that 40% of the CH2OO formed in the reactions isstabilised	Rickard et al., 1999	fractional increase in carbonyl yield (GC-FID) in the presence of SO2
propene	0.34	0.01	both	T		Newland et al., 2020	SO2 removal
2-methylpropene	0.174	0.032	both	T		Hatakeyama et al., 1984	H2SO4 (GC) yield from SO2 + SCI
2-methylpropene	0.13	NA	CI2	F		Neeb et al., 1997	HMHP (HPLC) yield from H2O + SCI
2-methylpropene	0.24	0.03	both	T		Newland et al., 2020	SO2 removal
1-butene	0.27	0.04	both	F		Hasson et al., 2001b	difference in HMHP and propanal yield (GC-FID) in dry and humid exp
z-2-butene	0.18	NA	CI1	F		Niki et al., 1977	Secondary Ozonide (FTIR) yield from HCHO + SCI
z-2-butene	0.43	0.03	CI1	F		Cox and Penkett, 1972	Unknown intermediate (GCFID - stoechiometry) yield = 1/I in table 4
z-2-butene	0.38	0.05	CI1	T		Newland et al., 2015a	SO2 removal
z-2-butene	0.19	NA	CI1	F		Rickard et al., 1999	fractional increase in carbonyl yield (GC-FID) in the presence of SO2
e-2-butene	0.185	0.028	CI1	T		Hatakeyama et al., 1984	H2SO4 (GC) yield from SO2 + SCI
e-2-butene	0.42	NA	CI1	F		Horie and Moortgat, 1991	FTIR - Model
e-2-butene	0.45	0.03	CI1	F		Cox and Penkett, 1972	Unknown intermediate (GCFID - stoechiometry) yield = 1/I in table 4
e-2-butene	0.24	0.07	CI1	F	Assumes 100 % of CH2))+H2O --> HMHP and 100 % of larger CI + H2O --> carbonyl	Hasson et al., 2001a	H2O2 (HPLC-fluorescence) yield from H2O + SCI
e-2-butene	0.13	NA	CI1	F		Rickard et al., 1999	fractional increase in carbonyl yield (GC-FID) in the presence of SO2
e-2-butene	0.28	0.03	CI1	T		Newland et al., 2015a	SO2 removal
e-2-butene	0.53	0.28	CI1	F		Berndt et al., 2012	H2SO4 (CI-APi-TOFms) yield from SO2 + SCI with OH scavenger	Superseded by Berndt et al., 2014a
e-2-butene	0.42	NA	CI1	F		Horie and Moortgat, 1991	FTIR - Model
e-2-butene	0.49	0.22	CI1	T		Berndt et al., 2014a	H2SO4 (CI-APi-TOFms) yield from SO2 + SCI with OH scavenger
2-methyl-1-butene	0.33	0.01	both	T		Newland et al., 2020	SO2 removal
2-methyl-2-butene	0.1	NA	both	F		Rickard et al., 1999	fractional increase in carbonyl yield (GC-FID) in the presence of SO2
2-methyl-2-butene	0.28	0.01	both	T		Newland et al., 2020	SO2 removal
1-pentene	0.29	0.05	both	F	Assumes 100 % of CH2))+H2O --> HMHP and 100 % of larger CI + H2O --> carbonyl	Hasson et al., 2001b	difference in butanal yield (GC-FID) in dry and humid exp
cis-2-pentene	0.37	0.06	both	F		Cox and Penkett, 1972	Unknown intermediate (GCFID - stoechiometry) yield = 1/I in table 4
2,3-dimethyl-2-butene	0.62	0.28	both	F		Berndt et al., 2012	H2SO4 (CI-APi-TOFms) yield from SO2 + SCI with OH scavenger	Superseded by Berndt et al., 2014a
2,3-dimethyl-2-butene	0.32	0.02	both	T		Newland et al., 2015a	SO2 removal
2,3-dimethyl-2-butene	0.31	0.04	both	T		Newland et al., 2020	SO2 removal
2,3-dimethyl-2-butene	0.68	0.12	both	F		Drozd et al., 2011	Secondary Ozonide (FTIR) yield from HFA (CF3C(=O)CF3; selective SCI scavenger) + SCI at P=710 torr
2,3-dimethyl-2-butene	0.1	0.03	both	F		Hasson et al., 2001a	H2O2 (HPLC-fluorescence) yield from H2O + SCI
2,3-dimethyl-2-butene	0.45	0.2	both	T		Berndt et al., 2014b	H2SO4 (CI-APi-TOFms) yield from SO2 + SCI with OH scavenger
2,3-dimethyl-2-butene	0.373	0.014	both	T		Hakala and Donahue, 2016	H2SO4 (CI-APi-TOFms) yield from SO2 + SCI with OH scavenger
2,3-dimethyl-2-butene	0.11	NA	both	F		Rickard et al., 1999	fractional increase in carbonyl yield (GC-FID) in the presence of SO2
2-methyl-1-pentene	0.37	0.07	both	F		Cox and Penkett, 1972	Unknown intermediate (GCFID - stoechiometry) yield = 1/I in table 4
1-hexene	0.81	0.05	both	F		Cox and Penkett, 1972	Unknown intermediate (GCFID - stoechiometry) yield = 1/I in table 4
1-heptene	0.61	0.03	both	T		Newland et al., 2020	SO2 removal
2,4-dimethyl-2-pentene	0.41	0.01	both	T		Newland et al., 2020	SO2 removal
1-octene	0.22	NA	both	F		Paulson and Seinfeld, 1992	GC-FID/GC-MS + model
1-octene	0.35	0.09	both	F	Assumes 100 % of CH2))+H2O --> HMHP and 100 % of larger CI + H2O --> carbonyl	Hasson et al., 2001b	difference in heptanal yield (GC-FID) in dry and humid exp
2,3,4-trimethyl-2-pentene	0.49	0.01	both	T		Newland et al., 2020	SO2 removal

## Sheet: Polyalkenes
molecule	measured SCI yield	absolute error	criegee	Valid		ref	Details	Notes
Isoprene	0.56	0.03	all	T	Newland et al., 2015b	SO2 removal
Isoprene	0.26	0.04	all	F	Hasson et al., 2001b	Sum of difference between HMHP and H2O2 yields at high/low [H2O]
Isoprene	0.28	0.14	all	F	Rickard et al., 1999	Assumes 40% of CH2OO is stabilised + difference between MVK and MACR production at high/low [SO2]
Isoprene	0.53	NA	all	T	Rickard et al., 1999	Assumes 95% of CH2OO is stabilised + difference between MVK and MACR production at high/low [SO2]		See discussion in Newland et al., 2015b
Isoprene	0.61	0.09	all	T	Nguyen et al., 2016	SO2 and H2O CI scavengers
Isoprene	0.58	0.26	all	T	Sipilä et al., 2014	H2SO4 (CI-APi-TOFms) yield from SO2 + SCI with OH scavenger
myrcene	0.46	0.03	all	T	Newland et al., 2020	SO2 removal
limonene	0.27	0.12	all	T	Sipilä et al., 2014	H2SO4 (CI-APi-TOFms) yield from SO2 + SCI with OH scavenger
limonene	0.23	0.01	all	T	Newland et al., 2018	SO2 removal
limonene	0.34	NA	all	T	Leungsakul et al., 2005
b-caryophyllene	> 0.6	NA	all	F	Winterhalter et al., 2009	HCOOH removal
b-caryophyllene	0.74		all	F	Nguyen et al., 2009a	Theory

## Sheet: Endocyclic alkenes
molecule	measured SCI yield	absolute error	criegee	Valid		ref	Details	Notes
cyclopentene	0.052	0.013	CI1	T	Hatakeyama et al., 1984	H2SO4 (GC) yield from SO2 + SCI
cyclohexene	0.032	0.024	CI1	T	Hatakeyama et al., 1984	H2SO4 (GC) yield from SO2 + SCI
cycloheptene	0.029	0.015	CI1	T	Hatakeyama et al., 1984	H2SO4 (GC) yield from SO2 + SCI
methylcyclohexene	0.104	0.026	both	T	Hatakeyama et al., 1984	H2SO4 (GC) yield from SO2 + SCI
methylcyclohexene	0.16	0.07	both	T	Berndt et al., 2012	H2SO4 (CI-APi-TOFms) yield from SO2 + SCI with OH scavenger
a-pinene	0.125	0.04	both	T	Hatakeyama et al., 1984	H2SO4 (GC) yield from SO2 + SCI
a-pinene	0.19	0.01	both	T	Newland et al., 2018	SO2 removal
a-pinene	0.15	0.07	both	T	Sipilä et al., 2014	H2SO4 (CI-APi-TOFms) yield from SO2 + SCI with OH scavenger
a-pinene	0.22	NA	both	T	Taipale et al., 2014	H2SO4 yield (CI-APi-TOFms) from SO2 + SCI

## Sheet: Exocyclic alkenes
molecule	measured SCI yield	absolute error	criegee	Valid		ref	Details	Notes
methylenecyclohexane	0.216	0.026	both	T	Hatakeyama et al., 1984	H2SO4 (GC) yield from SO2 + SCI
methylenecyclohexane	0.14	0.04	CI1	F	Hasson et al., 2001b	difference in ketone yield (GC-FID) in dry and humid exp
b-pinene	0.368	0.07	CI1	F	Nguyen et al., 2009b	Theory
b-pinene	0.6	0.03	both	T	Newland et al., 2018	SO2 removal
b-pinene	0.249	0.024	both	T	Hatakeyama et al., 1984	H2SO4 (GC) yield from SO2 + SCI
b-pinene	0.4	0.02	both	F	Ahrens et al., 2014	FTIR
b-pinene	0.27	0.06	CI1	F	Hasson et al., 2001b	difference in nopinone yield (GC-FID) in dry and humid exp
b-pinene	0.35	0.05	CI1		Winterhalter et al., 2000	difference in nopinone yield (FT-IR) in dry and humid exp
camphene	0.13	0.045	CI2	F	Hasson et al., 2001b	difference in HMHP yield (HPLC-FD) in dry and humid exp

## Sheet: Oxygenated alkenes
molecule	measured SCI yield	absolute error	criegee	Valid		ref	Details	Notes
methacrylic acid	0.98	0.12	both	F	Neeb et al., 1998a	kinetics measurement and least square fit
acrylic acid	0.65	0.13	both	F	Neeb et al., 1998a	kinetics measurement and least square fit

## Sheet: Aromatic alkenes
molecule	measured SCI yield	absolute error	criegee	Valid		ref	Details	Notes
styrene	0.258	0.012	both	T		Hatakeyama et al., 1984	H2SO4 (GC) yield from SO2 + SCI
