# Supplementary material for: Estimation of mechanistic parameters in the gas-phase reactions of ozone with alkenes for use in automated mechanism construction
Source: Copernicus journal article supplement (doi:10.5194/acp-2021-1031), 2022-01-03
Supplement: Supplementary file 3 [file S3_OH_yields.xlsx]

## Sheet: References
Reference
Alam et al., 2011	Alam, M. S., Camredon, M., Rickard, A. R., Carr, T., Wyche, K. P., Hornsby, K. E., Monks, P. S., and Bloss, W. J.: Total radical yields from tropospheric ethene ozonolysis, Phys. Chem. Chem. Phys., 13, 11002–11015, 2011.
Alam et al., 2013	Alam, M. S., Rickard, A. R., Camredon, M., Wyche, K. P., Carr, T., Hornsby, K. E., ... & Bloss, W. J.: Radical product yields from the ozonolysis of short chain alkenes under atmospheric boundary layer conditions. The Journal of Physical Chemistry A, 117(47), 12468-12483, 2013.
Alvarado et al., 1998	Alvarado, A., Tuazon, E. C., Aschmann, S. M., Atkinson, R., & Arey, J.: Products of the gas‐phase reactions of O (3 P) atoms and O3 with α‐pinene and 1, 2‐dimethyl‐1‐cyclohexene. Journal of Geophysical Research: Atmospheres, 103(D19), 25541-25551, 1998.
Atkinson et al., 1992	Atkinson, R., Aschmann, S. M., Arey, J., & Shorees, B.: Formation of OH radicals in the gas phase reactions of O3 with a series of terpenes. Journal of Geophysical Research: Atmospheres, 97(D5), 6065-6073, 1992.
Atkinson et al., 1995	Atkinson, R., Tuazon, E. C., & Aschmann, S. M.: Products of the gas-phase reactions of O3 with alkenes. Environmental science & technology, 29(7), 1860-1866, 1995.
Atkinson and Aschmann 1993	Atkinson, R., & Aschmann, S. M.: Hydroxyl radical production from the gas-phase reactions of ozone with a series of alkenes under atmospheric conditions. Environmental science & technology, 27(7), 1357-1363, 1993.
Aschmann et al., 2002	Aschmann, S. M., Arey, J., & Atkinson, R.: OH radical formation from the gas-phase reactions of O3 with a series of terpenes. Atmospheric Environment, 36(27), 4347-4355. 2002.
Berndt et al., 2003	Berndt, T., Böge, O., & Stratmann, F.: Gas-phase ozonolysis of α-pinene: gaseous products and particle formation. Atmospheric Environment, 37(28), 3933-3945, 2003.
Calvert et al., 2000	Calvert, J. G., Atkinson, R., Kerr, J. A., Madronich, S., Moortgat, G. K., Wallington, T. J., and Yarwood, G.: The Mechanism of Atmospheric Oxidation of the Alkenes, Oxford University Press, New York, USA, 552 pp., 2000.
Chew and Atkinson 1996	Chew, A. A., & Atkinson, R.: OH radical formation yields from the gas‐phase reactions of O3 with alkenes and monoterpenes. Journal of Geophysical Research: Atmospheres, 101(D22), 28649-28653, 1996.
Fenske et al., 2000a	Fenske, J. D., Hasson, A. S., Paulson, S. E., Kuwata, K. T., Ho, A., & Houk, K. N.: The pressure dependence of the OH radical yield from ozone− alkene reactions. The Journal of Physical Chemistry A, 104(33), 7821-7833, 2000.
Fenske et al., 2000b	Fenske, J. D., Kuwata, K. T., Houk, K. N., & Paulson, S. E..:OH radical yields from the ozone reaction with cycloalkenes. The Journal of Physical Chemistry A, 104(31), 7246-7254., 2000.
Forester and Wells, 2011	Forester, C. D., & Wells, J. R.: Hydroxyl radical yields from reactions of terpene mixtures with ozone. Indoor Air, 21(5), 400-409, 2011.
Gutbrod et al., 1992	Gutbrod, R., Schindler, R. N., Kraka, E., & Cremer, D.: Formation of OH radicals in the gas phase ozonolysis of alkenes: the unexpected role of carbonyl oxides. Chemical Physics Letters, 252(3-4), 221-229, 1996.
Gutbrod et al., 1997	Gutbrod, R., Meyer, S., Rahman, M. M., & Schindler, R. N.: On the use of CO as scavenger for OH radicals in the ozonolysis of simple alkenes and isoprene. International Journal of Chemical Kinetics, 29(9), 717-723, 1997.
Hasson et al., 2003	Hasson, A. S., Chung, M. Y., Kuwata, K. T., Converse, A. D., Krohn, D., & Paulson, S. E.: Reaction of Criegee Intermediates with Water Vapor An Additional Source of OH Radicals in Alkene Ozonolysis?. The Journal of Physical Chemistry A, 107(32), 6176-6182, 2003.
Hermann et al., 2010	Herrmann, F., Winterhalter, R., Moortgat, G. K., & Williams, J.: Hydroxyl radical (OH) yields from the ozonolysis of both double bonds for five monoterpenes. Atmospheric Environment, 44(28), 3458-3464, 2002.
Horie et al., 1994	Horie, O., Neeb, P., & Moortgat, G. K.: Ozonolysis of trans‐and cis‐2‐butenes in low parts‐per‐million concentration ranges. International journal of chemical kinetics, 26(11), 1075-1094, 1994.
Klotz et al., 2004	Klotz, B., Barnes, I., & Imamura, T.: Product study of the gas-phase reactions of O 3, OH and NO 3 radicals with methyl vinyl ether. Physical Chemistry Chemical Physics, 6(8), 1725-1734, 2004.
Kramp and Paulson 2000	Kramp, F., & Paulson, S. E.: The gas phase reaction of ozone with 1, 3-butadiene: formation yields of some toxic products. Atmospheric Environment, 34(1), 35-43, 2000.
Kroll et al., 2002	Kroll, J. H., Donahue, N. M., Cee, V. J., Demerjian, K. L., & Anderson, J. G.: Gas-phase ozonolysis of alkenes: Formation of OH from anti carbonyl oxides. Journal of the American Chemical Society, 124(29), 8518-8519, 2002.
Malkin et al., 2010	Malkin, T. L., Goddard, A., Heard, D. E., & Seakins, P. W: Measurements of OH and HO 2 yields from the gas phase ozonolysis of isoprene. Atmospheric Chemistry and Physics, 10(3), 1441-1459, 2010.
McGill et al., 1999	McGill, C. D., Rickard, A. R., Johnson, D., & Marston, G. : Product yields in the reactions of ozone with Z-but-2-ene, E-but-2-ene and 2-methylbut-2-ene. Chemosphere, 38(6), 1205-1212, 1999.
Neeb and Moortgat 1999	Neeb, P., & Moortgat, G. K.: Formation of OH radicals in the gas-phase reaction of propene, isobutene, and isoprene with O3: Yields and mechanistic implications. The Journal of Physical Chemistry A, 103(45), 9003-9012, 1999.
Nguyen et al., 2009a	Nguyen, T. L., Winterhalter, R., Moortgat, G., Kanawati, B., Peeters, J., and Vereecken, L.: The gas-phase ozonolysis of b-caryophyllene (C15H24). Part II: A theoretical study, Phys. Chem. Chem. Phys., 11, 4173-4183, 2009a.
Nguyen et al., 2009b	Nguyen, T. L., Peeters, J., and Vereecken, L.: Theoretical study of the gas-phase ozonolysis of b-pinene (C10H16), Phys. Chem. Chem. Phys., 11, 5643-5656, 2009b.
Orzechowska and Paulson, 2002	Orzechowska, G. E., & Paulson, S. E. (2002). Production of OH radicals from the reactions of C4–C6 internal alkenes and styrenes with ozone in the gas phase. Atmospheric Environment, 36(3), 571-581.
Paulson and Seinfeld 1992	Paulson, S. E., & Seinfeld, J.: Atmospheric photochemical oxidation of 1-octene: OH, O3, and O (3P) reactions. Environmental Science & Technology, 26(6), 1992. 1165-1173.
Paulson et al., 1998	Paulson, S. E., Chung, M., Sen, A. D., & Orzechowska, G.: Measurement of OH radical formation from the reaction of ozone with several biogenic alkenes. Journal of Geophysical Research: Atmospheres, 103(D19), 25533-25539, 1998.
Paulson et al., 1999	Paulson, S. E., Myeong, C. Y., and Hasson, A. S.: OH Radical Formation from the Gas-Phase Reaction of Ozone with Terminal Alkenes and the Relationship between Structure and Mechanism, J. Phys. Chem. A, Vol. 103, No. 41, 1999.
Presto and Donahue, 2004	Presto, A. A., & Donahue, N. M.: Ozonolysis fragment quenching by nitrate formation: The pressure dependence of prompt OH radical formation. The Journal of Physical Chemistry A, 108(42), 9096-9104, 2004.
Qi et al., 2009	Qi, B., Yang, B., Wang, Z., Yang, H., & Liu, L.: Production of radicals in the ozonolysis of propene in air. Science in China Series B: Chemistry, 52(3), 356-361, 2009.
Rickard et al., 1999	Rickard, A. R., Johnson, D., McGill, C. D., and Marston, G.:. OH Yields in the Gas-Phase reactions of Ozone with Alkenes, J. Phys. Chem. A, 103, 7656–7664, 1999.
Siese et al., 2001	Siese, M., Becker, K. H., Brockmann, K. J., Geiger, H., Hofzumahaus, A., Holland, F., ... & Wirtz, K.: Direct measurement of OH radicals from ozonolysis of selected alkenes: a EUPHORE simulation chamber study. Environmental science & technology, 35(23), 4660-4667, 2001.
Wegener et al., 2007	Wegener, R., Brauers, T., Koppmann, R., Rodríguez Bares, S., Rohrer, F., Tillmann, R., ... & Wisthaler, A.: Simulation chamber investigation of the reactions of ozone with short‐chained alkenes. Journal of Geophysical Research: Atmospheres, 112, 2007.

## Sheet: Monoalkenes
molecule	measured OH yield	absolute error	Reference	Valid	Technique	Notes
ethene	0.17	0.09	Alam et al., 2011	T	Direct measurement by LIF in chamber experiments
ethene	0.12	0.5	Atkinson et al., 1992	T	Cyclohexane as OH scavenger - measure cyclohexanol and cyclohexanone yields
ethene	0.05	NA	Gutbrod et al., 1996	F	Theory
ethene	0.14	0.07	Rickard et al., 1999	T	Loss of 1,3,5-TMB
ethene	0.22	0.06	Fenske et al. 2000a	T	Loss of m-xylene / 1,3,5-TMB
ethene	0.08	0.01	Hasson et al., 2003	T	Loss of m-xylene / 1,3,5-TMB / di-n-butyl ether
propene	0.33	0.07	Fenske et al. 2000a	T	Loss of m-xylene / 1,3,5-TMB
propene	0.36	0.1	Alam et al., 2013	T	Direct measurement by LIF in chamber experiments
propene	0.33	0.14	Atkinson and Aschmann, 1993	T	Cyclohexane as OH scavenger - measure cyclohexanol and cyclohexanone yields
propene	0.18	0.01	Gutbrod et al., 1997	F	Measurement of CO2 production with 40% by vol. CO as OH scavenger	All measurements from this dataset appear to underestimate OH yields
propene	0.34	0.06	Neeb and Moortgat, 1999	T	Inferred from change in alkene loss rate at varying levels of cyclohexane
propene	0.35	0.07	Paulson et al., 1999	T	Loss of m-xylene / 1,3,5-TMB
propene	0.4	0.06	Aschmann et al., 2003	T	2,3-butanediol as OH scavenger - measuring 3-hydroxy-2-butanone yields
propene	0.1	0.07	Wegener et al., 2007	F	Change in alkene loss rate when experiments were performed with or without CO as OH scavenger
propene	0.3	0.08	Wegener et al., 2007	F	Change in alkene loss rate when experiments were performed with or without CO as OH scavenger (high humidity)
propene	0.39	0.08	Qi et al., 2009	T	Modeling of total radical yields measured by PERCA from flow tube experiments
propene	0.32	0.16	Rickard et al., 1999	T	Loss of 1,3,5-TMB
z-2-butene	0.26	0.07	Alam et al., 2013	T	Direct measurement by LIF in chamber experiments
z-2-butene	0.41	0.21	Atkinson and Aschmann, 1993	T	Cyclohexane as OH scavenger - measure cyclohexanol and cyclohexanone yields
z-2-butene	0.14	0.03	Horie et al., 1994	F	Inferred from (additional) conversion of alkene relative to ozone
z-2-butene	0.17	0.02	Gutbrod et al., 1997	F	Measurement of CO2 production with 40% by vol. CO as OH scavenger
z-2-butene	0.33	0.07	McGill et al., 1999	T	Loss of 1,3,5-TMB
z-2-butene	0.33	0.05	Orzechowska and Paulson, 2002	T	Loss of m-xylene / 1,3,5-TMB / di-n-butyl ether / di-n-propyl ether
z-2-butene	0.18	0.09	Wegener et al., 2007	F	Change in alkene loss rate when experiments were performed with or without CO as OH scavenger
z-2-butene	0.4	0.05	Wegener et al., 2007	F	Change in alkene loss rate when experiments were performed with or without CO as OH scavenger (high humidity)
z-2-butene	0.14	0.05	Horie et al., 1994	F	Inferred from (additional) conversion of alkene relative to ozone
z-2-butene	0.33	0.16	Rickard et al., 1999	T	Loss of 1,3,5-TMB
e-2-butene	0.63	0.17	Alam et al., 2013	T	Direct measurement by LIF in chamber experiments
e-2-butene	0.64	0.32	Atkinson and Aschmann, 1993	T	Cyclohexane as OH scavenger - measure cyclohexanol and cyclohexanone yields
e-2-butene	0.24	0.05	Horie et al., 1994	F	Inferred from (additional) conversion of alkene relative to ozone
e-2-butene	0.24	0.02	Gutbrod et al., 1997	F	Measurement of CO2 production with 40% by vol. CO as OH scavenger
e-2-butene	0.54	0.11	McGill et al., 1999	T	Loss of 1,3,5-TMB
e-2-butene	0.75	0.19	Siese et al., 2001	T	Direct measurement by LIF in chamber experiments
e-2-butene	0.64	0.12	Orzechowska and Paulson, 2002	T	Loss of m-xylene / 1,3,5-TMB / di-n-butyl ether / di-n-propyl ether
e-2-butene	0.54	0.05	Hasson et al., 2003	T	Loss of m-xylene / 1,3,5-TMB / di-n-butyl ether
e-2-butene	0.54	0.11	McGill et al., 1999	T	Loss of 1,3,5-TMB
e-2-butene	0.7	0.12	Wegener et al., 2007	F	Change in alkene loss rate when experiments were performed with or without CO as OH scavenger
e-2-butene	0.6	0.12	Wegener et al., 2007	F	Change in alkene loss rate when experiments were performed with or without CO as OH scavenger (high humidity)
e-2-butene	0.67	0.19	Fenske et al. 2000a	T	Loss of m-xylene / 1,3,5-TMB
e-2-butene	0.56	0.12	Fenske et al. 2000a	T	Loss of m-xylene / 1,3,5-TMB
2-methyl-2-butene	0.89	0.45	Atkinson and Aschmann, 1993	T	Cyclohexane as OH scavenger - measure cyclohexanol and cyclohexanone yields
2-methyl-2-butene	0.93	0.14	Chew and Atkinson, 1996	T	2-butanone yield from OH+2-butanol
2-methyl-2-butene	0.81	0.16	McGill et al., 1999	T	Loss of 1,3,5-TMB
2-methyl-2-butene	0.89	0.22	Siese et al., 2001	T	Direct measurement by LIF in chamber experiments
2-methyl-2-butene	0.98	0.24	Orzechowska and Paulson, 2002	T	Loss of m-xylene / 1,3,5-TMB / di-n-butyl ether / di-n-propyl ether
2-methyl-2-butene	0.8	0.12	Orzechowska and Paulson, 2002	T	Product formation from OH+2-butanol
2,3-dimethyl-2-butene	0.83	0.22	Alam et al., 2013	T	Direct measurement by LIF in chamber experiments
2,3-dimethyl-2-butene	1	0.5	Atkinson and Aschmann, 1993	T	Cyclohexane as OH scavenger - measure cyclohexanol and cyclohexanone yields
2,3-dimethyl-2-butene	0.8	0.12	Chew and Atkinson, 1996	T	2-butanone yield from OH+2-butanol
2,3-dimethyl-2-butene	0.36	0.02	Gutbrod et al., 1996	F	Measurement of CO2 production with 40% by vol. CO as OH scavenger
2,3-dimethyl-2-butene	0.89	0.44	Rickard et al., 1999	T	Loss of 1,3,5-TMB
2,3-dimethyl-2-butene	0.99	0.18	Fenske et al., 2000a	T	Loss of m-xylene / 1,3,5-TMB
2,3-dimethyl-2-butene	1	0.25	Siese et al., 2001	T	Direct measurement by LIF in chamber experiments
2,3-dimethyl-2-butene	0.91	0.14	Orzechowska and Paulson, 2002	T	Product formation from OH+2-butanol
2,3-dimethyl-2-butene	1.07	0.16	Aschmann et al., 2003	T
2,3-dimethyl-2-butene	0.89	0.22	Rickard et al., 1999	T	Loss of 1,3,5-TMB
1-butene	0.56	0.15	Alam et al., 2013	T	Direct measurement by LIF in chamber experiments
1-butene	0.41	0.21	Atkinson and Aschmann, 1993	T	Cyclohexane as OH scavenger - measure cyclohexanol and cyclohexanone yields
1-butene	0.29	0.04	Paulson et al., 1999	T	Loss of m-xylene / 1,3,5-TMB
1-butene	0.23	0.04	Fenske et al. 2000a	T	Loss of m-xylene / 1,3,5-TMB
1-butene	0.001	0.08	Wegener et al., 2007	F	Change in alkene loss rate when experiments were performed with or without CO as OH scavenger
1-butene	0.3	0.09	Wegener et al., 2007	F	Change in alkene loss rate when experiments were performed with or without CO as OH scavenger (high humidity)
2-methylpropene	0.67	0.18	Alam et al., 2013	T	Direct measurement by LIF
2-methylpropene	0.84	0.42	Atkinson and Aschmann, 1993	T	Cyclohexane as OH scavenger - measure cyclohexanol and cyclohexanone yields
2-methylpropene	0.6	0.06	Neeb and Moortgat, 1999	T	Inferred from change in alkene loss rate at varying levels of cyclohexane
2-methylpropene	0.72	0.12	Paulson et al., 1999	T	Loss of m-xylene / 1,3,5-TMB
2-methylpropene	0.6	0.3	Rickard et al., 1999	T	Loss of 1,3,5-TMB
2-methylpropene	0.3	0.14	Wegener et al., 2007	F	Change in alkene loss rate when experiments were performed with or without CO as OH scavenger
2-methylpropene	0.8	0.1	Wegener et al., 2007	F	Change in alkene loss rate when experiments were performed with or without CO as OH scavenger (high humidity)
1-pentene	0.37	0.19	Atkinson et al., 1995	T	Cyclohexane as OH scavenger - measure cyclohexanol and cyclohexanone yields
1-pentene	0.24	0.05	Paulson et al., 1999	T	Loss of m-xylene / 1,3,5-TMB
e-2-pentene	0.46	0.08	Orzechowska and Paulson, 2002	T	Loss of m-xylene / 1,3,5-TMB / di-n-butyl ether / di-n-propyl ether
z-2-pentene	0.29	0.06	Orzechowska and Paulson, 2002	T	Loss of m-xylene / 1,3,5-TMB / di-n-butyl ether / di-n-propyl ether
z-2-pentene	0.27	0.07	Orzechowska and Paulson, 2002	T	Product formation from OH+2-butanol
2-methyl-1-butene	0.83	0.42	Atkinson and Aschmann, 1993	T	Cyclohexane as OH scavenger - measure cyclohexanol and cyclohexanone yields
2-methyl-1-butene	0.67	0.12	Paulson et al., 1999	T	Loss of m-xylene / 1,3,5-TMB
1-hexene	0.32	0.16	Atkinson et al., 1995	T	Cyclohexane as OH scavenger - measure cyclohexanol and cyclohexanone yields
1-hexene	0.18	0.04	Paulson et al., 1999	T	Loss of m-xylene / 1,3,5-TMB
z-3-hexene	0.3	0.02	Kroll et al., 2002	T	Low pressure (6 Torr) flow tube experiments, OH detected by LIF
z-3-hexene	0.36	0.07	Orzechowska and Paulson, 2002	T	Loss of m-xylene / 1,3,5-TMB / di-n-butyl ether / di-n-propyl ether
e-3-hexene	0.62	0.11	Fenske et al. 2000a	T	Loss of m-xylene / 1,3,5-TMB
e-3-hexene	0.46	0.17	Fenske et al. 2000a	T	Loss of m-xylene / 1,3,5-TMB
e-3-hexene	0.53	0.08	Orzechowska and Paulson, 2002	T	Loss of m-xylene / 1,3,5-TMB / di-n-butyl ether / di-n-propyl ether
e-3-hexene	0.53	0.02	Kroll et al., 2002	T	Low pressure (6 Torr) flow tube experiments, OH detected by LIF
2,3-dimethyl-1-butene	0.5	0.25	Atkinson et al., 1995	T	Cyclohexane as OH scavenger - measure cyclohexanol and cyclohexanone yields
1-heptene	0.27	0.14	Atkinson et al., 1995	T	Cyclohexane as OH scavenger - measure cyclohexanol and cyclohexanone yields
1-octene	0.1	0.03	Paulson et al., 1999	T	Loss of m-xylene / 1,3,5-TMB
1-octene	0.18	0.09	Atkinson et al., 1995	T	Cyclohexane as OH scavenger - measure cyclohexanol and cyclohexanone yields
1-octene	0.45	0.2	Paulson and Seinfeld, 1992	F	Methylcyclohexane as OH tracer

## Sheet: Polyalkenes
molecule	measured OH yield	absolute error	Reference	Valid	Technique
1,3-butadiene	0.08	0.04	Atkinson and Aschmann, 1993	T	Cyclohexane as OH scavenger - measure cyclohexanol and cyclohexanone yields
1,3-butadiene	0.13	0.03	Kramp and Paulson 2000	T	Loss of 1,3,5-TMB
isoprene	0.26	0.04	Neeb and Moortgat, 1999	T	Inferred from change in alkene loss rate at varying levels of cyclohexane
isoprene	0.44	0.22	Rickard et al., 1999	T	Loss of 1,3,5-TMB
isoprene	0.25	0.06	Paulson et al., 1998	T	Loss of m-xylene / 1,3,5-TMB / di-n-butyl ether
isoprene	0.27	0.13	Atkinson et al., 1992	T	Cyclohexane as OH scavenger - measure cyclohexanol and cyclohexanone yields
isoprene	0.25	0.04	Malkin et al., 2010	T	(i) cyclohexane as scavenger, measure cyclohexanone yields; (ii) removal of 1,3,5-trimethylbenzene; (iii) pseudo first order experiements in presence / absence of cyclohexane as OH scavenger; (iv) direct OH detection via FAGE
myrcene	1.15	0.57	Atkinson et al., 1992	F	Cyclohexane as OH scavenger - measure cyclohexanol and cyclohexanone yields
myrcene	0.63	0.09	Aschmann et al., 2002	T	2-butanone yield from OH+2-butanol
ocimene	0.63	0.31	Atkinson et al., 1992	F	Cyclohexane as OH scavenger - measure cyclohexanol and cyclohexanone yields
ocimene	0.55	0.09	Aschmann et al., 2002	T	2-butanone yield from OH+2-butanol
terpinolene	1.03	0.51	Atkinson et al., 1992	F	Cyclohexane as OH scavenger - measure cyclohexanol and cyclohexanone yields
terpinolene	0.74	0.1	Aschmann et al., 2002	T	2-butanone yield from OH+2-butanol
terpinolene	0.66	0.2	Hermann et al., 2010	T	Cyclohexane as OH scavenger - measure cyclohexanone yields
a-phellandrene	0.29	0.09	Hermann et al., 2010	T	Cyclohexane as OH scavenger - measure cyclohexanone yields
b-phellandrene	0.14	0.07	Atkinson et al., 1992	T	Cyclohexane as OH scavenger - measure cyclohexanol and cyclohexanone yields
a-terpinene	0.38	0.05	Aschmann et al., 2002	T	2-butanone yield from OH+2-butanol
a-terpinene	0.26	0.08	Hermann et al., 2010	T	Cyclohexane as OH scavenger - measure cyclohexanone yields
g-terpinene	0.81	0.11	Aschmann et al., 2002	T	2-butanone yield from OH+2-butanol
g-terpinene	0.97	0.3	Hermann et al., 2010	T	Cyclohexane as OH scavenger - measure cyclohexanone yields
limonene	0.86	0.358	Atkinson et al., 1992	F	Cyclohexane as OH scavenger - measure cyclohexanol and cyclohexanone yields
limonene	0.67	0.1	Aschmann et al., 2002	T	2-butanone yield from OH+2-butanol
limonene	0.64	0.06	Forester and Wells, 2011	T	2-butanone yield from OH+2-butanol
limonene	0.68	0.21	Hermann et al., 2010	T	Cyclohexane as OH scavenger - measure cyclohexanone yields
b-caryophyllene	0.08	NA	Nguyen et al., 2009a		Theory

## Sheet: Endocyclic alkenes
molecule	measured OH yield	absolute error	Reference	Valid	Technique
a-pinene	0.85	0.35	Atkinson et al., 1992	F	Cyclohexane as OH scavenger - measure cyclohexanol and cyclohexanone yields	Superseded by Aschmann et al., 2002
a-pinene	0.77	0.1	Aschmann et al., 2002	T	2-butanone yield from OH+2-butanol
a-pinene	0.76	0.11	Chew and Atkinson, 1996	T	2-butanone yield from OH+2-butanol
a-pinene	0.91	0.23	Siese et al., 2001	T	Direct measurement by LIF in chamber experiments
a-pinene	0.68	0.1	Berndt et al., 2003	T	Cyclohexane as OH scavenger - measure cyclohexanol and cyclohexanone yields
a-pinene	0.7	0.17	Paulson et al., 1998	T	Loss of m-xylene / 1,3,5-TMB / di-n-butyl ether
a-pinene	0.83	0.2075	Rickard et al., 1999	T	Loss of 1,3,5-TMB
a-pinene	0.89	0.2	Presto and Donahue, 2004	T	Production of HNO3 from ozonolysis in presence of NO2 in flow tube
a-pinene	0.76	0.06	Forester and Wells, 2011	T	2-butanone yield from OH+2-butanol
cyclopentene	0.58	0.16	Fenske et al. 2000a	T	Loss of m-xylene / 1,3,5-TMB
cyclopentene	0.61	0.254	Atkinson et al., 1995	T	Cyclohexane as OH scavenger - measure cyclohexanol and cyclohexanone yields
cyclopentene	1.19	NA	Calvert et al., 2000	F
cyclopentene	0.46	0.05	Calvert et al., 2000	F
cyclopentene	0.62	0.2	Calvert et al., 2000	F
cyclopentene	0.62	0.15	Fenske et al. 2000b	T	Loss of m-xylene / 1,3,5-TMB / di-n-butyl ether / di-n-propyl ether
cyclohexene	0.54	0.13	Fenske et al. 2000b	T	Loss of m-xylene / 1,3,5-TMB / di-n-butyl ether / di-n-propyl ether
cyclohexene	0.68	0.283	Atkinson and Aschmann, 1993	T	Cyclohexane as OH scavenger - measure cyclohexanol and cyclohexanone yields
cyclohexene	0.71	NA	Calvert et al., 2000	F
cyclohexene	0.39	0.02	Calvert et al., 2000	F
cyclohexene	0.38	0.11	Calvert et al., 2000	F
methylcyclohexene	0.9	0.375	Atkinson et al., 1995	T	Cyclohexane as OH scavenger - measure cyclohexanol and cyclohexanone yields
methylcyclohexene	0.91	0.2	Fenske et al. 2000b	T	Loss of m-xylene / 1,3,5-TMB / di-n-butyl ether / di-n-propyl ether
1,2-dimethylcyclohexene	1.02	0.16	Alvarado et al., 1998	T	Product formation from OH+2-butanol
cycloheptene	0.44	0.05	Calvert et al., 2000	F
cycloheptene	0.46	0.14	Calvert et al., 2000	F
cycloheptene	0.36	0.08	Fenske et al. 2000b	T	Loss of m-xylene / 1,3,5-TMB / di-n-butyl ether / di-n-propyl ether
cis-cyclooctene	0.39	0.5	Calvert et al., 2000	F
cis-cyclooctene	0.35	0.1	Calvert et al., 2000	F
cis-cyclodecene	0.4	0.05	Calvert et al., 2000	F
cis-cyclodecene	0.35	0.1	Calvert et al., 2000	F
2-carene	0.81	0.11	Aschmann et al., 2002	T	2-butanone yield from OH+2-butanol
3-carene	1.06	0.442	Atkinson et al., 1992	F	Cyclohexane as OH scavenger - measure cyclohexanol and cyclohexanone yields	Superseded by Aschmann et al., 2002
3-carene	0.86	0.11	Aschmann et al., 2002	T	2-butanone yield from OH+2-butanol

## Sheet: Exocyclic alkenes
molecule	measured OH yield	absolute error	Reference	Valid	Technique
b-pinene	0.35	0.15	Atkinson et al., 1992	T	Cyclohexane as OH scavenger - measure cyclohexanol and cyclohexanone yields
b-pinene	0.24	0.06	Rickard et al., 1999	T	Loss of 1,3,5-TMB
b-pinene	0.283	0.07	Nguyen et al., 2009b	F	Theory
camphene	0.18	0.075	Atkinson et al., 1992	T	Cyclohexane as OH scavenger - measure cyclohexanol and cyclohexanone yields
sabinene	0.26	0.13	Atkinson et al., 1992	F	Cyclohexane as OH scavenger - measure cyclohexanol and cyclohexanone yields
sabinene	0.33	0.05	Aschmann et al., 2002	T	2-butanone yield from OH+2-butanol
sabinene	0.33	0.06	Chew and Atkinson, 1996	T	2-butanone yield from OH+2-butanol

## Sheet: Oxygenated alkenes
molecule	measured OH yield	absolute error	Reference	Valid	Technique
methyl vinyl ether	0.14	0.07	Klotz et al., 2004	T	Loss of di-n-butyl ether
methyl vinyl ketone	0.16	0.05	Paulson et al., 1998	T	Loss of m-xylene / 1,3,5-TMB / di-n-butyl ether / di-n-propyl ether
2-methyl-3-buten-2-ol	0.19	0.09	Alvarado et al., 1998	T	Cyclohexane as OH scavenger - measure cyclohexanol and cyclohexanone yields
a-terpineol	0.64	0.08	Forester and Wells, 2011	T	2-butanone yield from OH+2-butanol
linalool	0.66	0.1	Aschmann et al., 2002	T	2-butanone yield from OH+2-butanol

## Sheet: Aromatic alkenes
molecule	measured OH yield	absolute error	Reference	Valid	Technique
styrene	0.07	0.04	Orzechowska and Paulson, 2002	T	Loss of m-xylene / 1,3,5-TMB / di-n-butyl ether / di-n-propyl ether
trans-B-methylstyrene	0.22	0.09	Orzechowska and Paulson, 2002	T	Loss of m-xylene / 1,3,5-TMB / di-n-butyl ether / di-n-propyl ether
a-methylstyrene	0.23	0.12	Orzechowska and Paulson, 2002	T	Loss of m-xylene / 1,3,5-TMB / di-n-butyl ether / di-n-propyl ether
