# Supplementary material for: Estimation of mechanistic parameters in the gas-phase reactions of ozone with alkenes for use in automated mechanism construction
Source: Copernicus journal article supplement (doi:10.5194/acp-2021-1031), 2022-01-03
Supplement: Supplementary file 4 [file acp-2021-1031-supplement.zip]

## Sheet: References
Reference
Al Mulla et al., 2010	Al Mulla, I., Viera, L., Morris, R., Sidebottom, H., Treacy, J., and Mellouki, A.: Kinetics and Mechanisms for the Reactions of Ozone with Unsaturated Oxygenated Compounds, Chem. Phys. Chem., 11, 4069-4078, 2010.
Aschmann and Atkinson, 1994	Aschmann, S. M., & Atkinson, R.. Formation yields of methyl vinyl ketone and methacrolein from the gas-phase reaction of O3 with isoprene. Environmental science & technology, 28, 1539-1542, 1994.
Atkinson et al., 1995	Atkinson, R., Arey, J., Aschmann, S. M., Corchnoy, S. B., and Shu, Y.,: Rate constants for the gas-phase reactions of cis-3-Hexen-1-ol, cis-3-Hexenylacetate, trans-2-Hexenal, and Linalool with OH and NO3 radicals and O3 at 296 ± 2 K, and OH radical formation yields from the O3 reactions, International Journal of Chemical Kinetics, Vol. 27, 941-955, 1995.
Barnes et al., 2005	Barnes, I., Zhou, S.M., Klotz, B.: In Final Report of the EU project MOST, Contract EVK2-CT-2001-00114. European Union, Brussels, 2005.
Bernard et al., 2010	Bernard, F., Eyglunent, G., Daële, V., and Mellouki, A.: Kinetics and Products of Gas-Phase Reactions of Ozone with Methyl Methacrylate, Methyl Acrylate, and Ethyl Acrylate, J. Phys._x000B_Chem. A, 114, 8376–8383, 2010.
Braure et al., 2015	Braure, T., Riffault, V., Tomas, A., Olariu, R. I., Arsene, C., Bedjanian, Y., and Coddeville, P.: Ozonolysis of a Series of Methylated Alkenes: Reaction Rate Coefficients and Gas-Phase Products, International Journal of Chemical Kinetics, Vol. 47, 596-605, 2015.
Chiappini et al., 2006	Chiappini, L., Carrasco, N., Temine, B., Picquet-Varrault, B., Durand-Jolibois, R., Wenger, J.C. and Doussin, J.F.: Gaseous and particulate products from the atmospheric ozonolysis of a biogenic hydrocarbon, sabinene. Environmental Chemistry, 3(4), 286-296, 2006.
Grosjean et al., 1993	Grosjean D, Williams EL, Grosjean E. Atmospheric chemistry of isoprene and of its carbonyl products. Environmental science & technology. 27, 830-840, 1993.
Grosjean et al., 1994	Grosjean, D., Grosjean, E., and Williams, E. L.: Atmospheric Chemistry of Olefins: A Product Study of the Ozone-Alkene Reaction with Cyclohexane Added to Scavenge OH, Environ. Sci. Technol., 28, 188–196, 1994.
Grosjean et al., 1996	Grosjean, E., Grosjean, D., and Seinfeld, J. H.: Gas phase reaction of ozone with trans-2-hexenal, trans-2-hexenyl acetate, ethylvinyl ketone and 6-methyl-5-hepten-2-one, Int. J. Chem. Kinet., 28, 373–382, 1996.
Grosjean and Grosjean, 1997	Grosjean, E., and Grosjean, D.: The Gas Phase Reaction of Unsaturated Oxygenates with Ozone: Carbonyl Products and Comparison with the Alkene-Ozone Reaction, J. Atmos. Chem., 27, 271-289, 1997.
Grosjean and Grosjean, 1999	Grosjean, E., and Grosjean, D.: The Reaction of Unsaturated Aliphatic Oxygenates with Ozone, J. Atmos. Chem., 32, 205-232, 1999.
Hakola et al., 1994	Hakola H, Arey J, Aschmann SM, Atkinson R. Product formation from the gas-phase reactions of OH radicals and O 3 with a series of monoterpenes. Journal of Atmospheric Chemistry, 18, 75-102, 1994.
Hasson et al., 2001a	Hasson, A. S., Orzechowska, G., and Paulson, S. E.: Production of stabilized Criegee intermediates and peroxides in the gas phase ozonolysis of alkenes 1. Ethene, trans-2-butene, and 2,3- dimethyl-2-butene, J. Geophys. Res., 106, 34131–34142, 2001a
Hasson et al., 2001b	Hasson, A. S., Ho, A. W., Kuwata, K., and Paulson, S. E.: Production of stabilized Criegee intermediates and peroxides in the gas phase ozonolysis of alkenes 2. Asymmetric and biogenic alkenes, J. Geophys. Res., 106, 34143–34153, 2001b.
Kalalian et al., 2020	Kalalian, C., Roth, E., El Dib, G., Singh, H. J., Rao, P. K., and Chakir, A.: Product investigation of the gas phase ozonolysis of 1-penten-3-ol, cis-2-penten-1-ol and trans-3-hexen-1-ol, Atmos. Environ., 238, 117732, 2020.
Klotz et al., 2004	Klotz, B., Barnes, I., and Imamura, T.: Product study of the gas phase reactions of O3, OH and NO3 reactions with methyl vinyl ether, Phys. Chem. Chem. Phys., 6, 1725–1734, 2004.
Kramp and Paulson, 2000	Kramp, F., & Paulson, S. E.: The gas phase reaction of ozone with 1, 3-butadiene: formation yields of some toxic products. Atmospheric Environment, 34, 35-43, 2000.
Lee et al., 2006	Lee, A., Goldstein, A. H., Keywood, M. D., Gao, S., Varutbangkul, V., Bahreini, R., Ng, N. L., Flagan, R. C., and Seinfeld, J. H.: Gas-phase products and secondary organic aerosol yields from the ozonolysis of ten different terpenes, J. Geophys. Res., 111, D07302, 2006.
Le Person et al., 2009	Le Person, A., Solignac, G., Oussar, F., Daële, V., Mellouki A., Winterhalter, R., and Moortgat, G. K.: Gas phase reaction of allyl alcohol (2-propen-1-ol) with OH radicals and ozone, Phys. Chem. Chem. Phys., 11, 7619–7628, 2009.
Ma and Marston, 2009	Ma, Y. and Marston, G., Formation of organic acids from the gas-phase ozonolysis of terpinolene. Physical Chemistry Chemical Physics, 11(21), 4198-4209., 2009.
Newland et al., 2020	Newland, M. J., Nelson B. S., Muñoz, A., Ródenas, M., Vera, T., Tarrega, J., and Rickard, A. R.: Trends in stabilisation of Criegee intermediates from alkene ozonolysis, Phys. Chem. Chem. Phys., 22, 13698-13706, 2020.
Nguyen et al., 2016	Nguyen, T. B., Tyndall, G. S., Crounse, J. D., Teng, A. P., Bates, K. H., Schwantes, R. H., Coggon, M. M., Zhang, L., Feiner, P., and Miller, D. O.: Atmospheric fates of Criegee intermediates in the ozonolysis of isoprene, Phys. Chem. Chem. Phys., 18, 10241– 10254, 2016.
Niki et al., 1983	Niki H, Maker PD, Savage CM, Breitenbach LP. Atmospheric ozone-olefin reactions. Environmental science & technology, 17, 312-322, 1983.
Niki et al., 1987	Niki, H., Maker, P. D., Savage, C. M., Breitenbach, L. P., and Hurley, M. D. FTIR spectroscopic study of the mechanism for the gas-phase reaction between ozone and tetramethylethylene, J. Phys. Chem. A, 91, 941–946, 1987.
O'Dwyer et al., 2010	O’Dwyer, M. A., Carey, T. J., Healy, R. M., Wenger, J. C., Picquet-Varrault, B., and Doussin, J. F.: The Gas-phase Ozonolysis of 1-Penten-3-ol, (Z)-2-Penten-1-ol, and 1-Penten-3-one: Kinetics, Products and Secondary Organic Aerosol Formation, J. Phys. Chem., 224, 1059–1080, 2010.
Orlando et al., 2000	Orlando, J. J., Nozière, B., Tyndall, G. S.., Orzechowska, G. E., Paulson, Se. E., and Rudich, Y.: Product studies of the OH- and ozone-initiated oxidation of some monoterpenes, J. Geophys. Res., 105, 11,561-11,572, 2000.
Paulson et al., 1999	Paulson, S. E., Myeong, C. Y., and Hasson, A. S.: OH Radical Formation from the Gas-Phase Reaction of Ozone with Terminal Alkenes and the Relationship between Structure and Mechanism, J. Phys. Chem. A, Vol. 103, No. 41, 1999.
Picquet-Varrault et al., 2010	Picquet-Varrault, B., Scarfogliero, M, and Doussin, J. –F.: Atmospheric Reactivity of Vinyl Acetate: Kinetic and Mechanistic Study of Its Gas-Phase Oxidation by OH, O3, and NO3, Environ. Sci. Technol., 44, 4615–4621, 2010.
Ren et al., 2017	Ren Y, Grosselin B, Daële V, and Mellouki A.: Investigation of the reaction of ozone with isoprene, methacrolein and methyl vinyl ketone using the HELIOS chamber. Faraday discussions. 22, 289-311, 2017.
Rickard et al., 1999	Rickard, A. R., Johnson, D., McGill, C. D., and Marston, G. OH Yields in the Gas-Phase reactions of Ozone with Alkenes, J. Phys. Chem. A, 103, 7656–7664, 1999.
Reissell et al., 1999	Reissell, A., Harry, C., Aschmann, S. M., Atkinson, R., and Arey, J.: Formation of acetone from the OH radical- and O3-initiated reactions of a series of monoterpenes, J. Geophys. Res., 104, 13869–13879, 1999.
Reissell et al., 2002	Reissell, A., Aschmann, S. M., Atkinson, R., and Arey, J.: Products of the OH radical- and O3-initiated reactions of myrcene and ocimene, J. Geophys. Res., 107, 4138, 10.1029/2001JD001234, 2002.
Shu et al., 1997	Shu, Y., Kwok, E. S. C., Tuazon, E. C., Atkinson, R., and Arey, J.: Products of the Gas-Phase Reactions of Linalool with OH Radicals, NO3 Radicals, and O3, Environ. Sci. Technol. 31, 896–904, 1997.
Thiault et al., 2002	Thiault, G., Th.venet, R., Mellouki, A., and Le Bras, G.: OH and O3-initiated oxidation of ethyl vinyl ether, Phys. Chem. Chem. Phys., 4, 613-619, 2002.
Tuazon et al., 1997	Tuazon, E. C., Aschmann, S. M., Arey, J., and Atkinson, R.: Products of the Gas-Phase Reactions of O3 with a Series of Methyl-Substituted Ethenes, Environ. Sci. Technol., 31, 10, 3004–3009, 1997.
Wang et al., 2015	Wang, J., Zhou, L., Wang, W., and Ge, M.: Gas-phase reaction of two unsaturated ketones with atomic Cl and O3: kinetics and products, Phys. Chem. Chem. Phys., 17, 12000–12012, 2015.
Winterhalter et al., 2000	Winterhalter, R., Neeb, P., Grossmann, D., Kolloff, A., Horie, O. and Moortgat, G.,: Products and mechanism of the gas phase reaction of ozone with β-pinene, Journal of Atmospheric Chemistry, 35), 165-197, 2000.
Yu et al., 1999	Yu J, Griffin RJ, Cocker III DR, Flagan RC, Seinfeld JH, Blanchard P. Observation of gaseous and particulate products of monoterpene oxidation in forest atmospheres. Geophysical Research Letters. 26, 1145-1148, 1999.
Zhou et al., 2006	Zhou, S., Barnes, I., Zhu, T., Klotz, B., Albu, M., Bejan, I., and Benter, T.: Product Study of the OH, NO3, and O3 Initiated Atmospheric Photooxidation of Propyl Vinyl Ether, Environ, Sci., Technol., 2006.

## Sheet: Monoalkenes
NOTE: carbonyl2 is the most substituted carbonyl product
molecule	measured carbonyl1 yield	absolute error carbonyl1	measured carbonyl2 yield	absolute error carbonyl2	reference
ethene	1.03	0.071	NA	NA	Grosjean and Grosjean, 1997
propene	0.78	0.015	0.52	0.026	Grosjean and Grosjean, 1997
propene	0.645	0.048	0.446	0.092	Tuazon et al., 1997
propene	-	-	0.34	0.01	Rickard et al., 1999
propene	-	-	0.38	0.06	Newland et al., 2020
1-butene	0.63	0.031	0.35	0.018	Grosjean and Grosjean, 1997
1-butene	-	-	0.45	0.02	Paulson et al., 1999
1-butene	-	-	0.36	0.03	Hasson et al., 2001b
z-2-butene	1.19	0.14	NA	NA	Tuazon et al., 1997
z-2-butene	1.08	0.08	NA	NA	Tuazon et al., 1997
z-2-butene	0.83	0.08	NA	NA	Rickard et al., 1999
e-2-butene	1.14	0.14	NA	NA	Tuazon et al., 1997
e-2-butene	1.09	0.02	NA	NA	Tuazon et al., 1997
e-2-butene	0.98	0.2	NA	NA	Rickard et al., 1999
2-methylpropene	0.95	0.098	0.34	0.031	Grosjean and Grosjean, 1997
2-methylpropene	1.01	0.07	0.323	0.03	Tuazon et al., 1997
2-methylpropene	-	-	0.294	0.03	Tuazon et al., 1997
2-methylpropene	-	-	0.28	0.01	Newland et al., 2020
1-pentene	0.595	0.055	0.541	0.065	Atkinson et al., 1995
1-pentene	0.505	0.003	0.496	0.016	Grosjean and Grosjean, 1997
1-pentene	-	-	0.38	0.03	Hasson et al., 2001b
2-methyl-1-butene	0.657	0.064	0.346	0.007	Grosjean and Grosjean, 1997
2-methyl-1-butene	0.93	0.01	0.4	0.01	Newland et al., 2020
2-methyl-2-butene	0.685	0.019	0.302	0.006	Grosjean and Grosjean, 1997
2-methyl-2-butene	0.745	0.099	0.376	0.032	Tuazon et al., 1997
2-methyl-2-butene	-	-	0.339	0.03	Tuazon et al., 1997
2-methyl-2-butene	0.66	0.02	0.35	0.03	Rickard et al., 1999
2-methyl-2-butene	-	-	0.34	0.01	Newland et al., 2020
3-methyl-1-butene	0.497	0.042	0.509	0.03	Grosjean and Grosjean, 1997
1-hexene	0.575	0.057	0.518	0.095	Atkinson et al., 1995
1-hexene	0.501	0.006	0.536	0.023	Grosjean and Grosjean, 1997
cis-3-hexene	1.022	0.077	NA	NA	Grosjean and Grosjean, 1997
trans-3-hexene	1.011	0.049	NA	NA	Grosjean and Grosjean, 1997
2-methyl-1-pentene	0.618	0.022	0.323	0.003	Grosjean and Grosjean, 1997
3-methyl-1-pentene	0.394	0.012	0.631	0.012	Grosjean and Grosjean, 1997
4-methyl-1-pentene	0.441	0.012	0.706	0.049	Grosjean and Grosjean, 1997
4-methyl-1-pentene	0.526	0.014	0.589	0.014	Braure et al., 2015
2,3-dimethyl-2-butene	1.02	0.13	-	-	Niki et al., 1987
2,3-dimethyl-2-butene	1.006	0.049	-	-	Grosjean and Grosjean, 1997
2,3-dimethyl-2-butene	0.977	0.089	-	-	Tuazon et al., 1997
2,3-dimethyl-2-butene	1.14	0.19	-	-	Tuazon et al., 1997
2,3-dimethyl-2-butene	1.04	0.1	-	-	Rickard et al., 1999
2,3-dimethyl-2-butene	1.05	0.01			Newland et al., 2020
3,3-dimethyl-1-butene	0.316	0.011	0.67	0.008	Grosjean and Grosjean, 1997
2-ethyl-1-butene	0.582	0.002	0.429	0.004	Grosjean and Grosjean, 1997
1-heptene	0.533	0.049	0.582	0.078	Atkinson et al., 1995
1-heptene	-	-	0.512	0.049	Grosjean and Grosjean, 1997
1-heptene	0.53	0.01	0.42	0.01	Newland et al., 2020
2,3-dimethyl-1-butene	0.776	0.071	0.391	0.05	Atkinson et al., 1995
2,3-dimethyl-1-butene	0.63	0.01	0.369	0.012	Grosjean and Grosjean, 1997
2,3,3-trimethyl-1-butene	0.639	0.03	0.352	0.022	Grosjean and Grosjean, 1997
2,4-dimethyl-2-pentene	0.196	0.013	0.861	0.03	Grosjean and Grosjean, 1997
2,4-dimethyl-2-pentene	0.22	0.01	1.04	0.03	Newland et al., 2020
1-octene	0.519	0.054	0.527	0.07	Atkinson et al., 1995
1-octene	0.476	0.029	0.473	0.023	Grosjean and Grosjean, 1997
1-octene	-	-	0.38	0.03	Hasson et al., 2001b
cis-4-octene	1.206	0.022	NA	NA	Grosjean and Grosjean, 1997
trans-4-octene	1.145	0.027	NA	NA	Grosjean and Grosjean, 1997
trans-2,5-dimethyl-3-hexene	1.398	0.085	NA	NA	Grosjean and Grosjean, 1997
trans-2,5-dimethyl-3-hexene	0.976	0.027	NA	NA	Braure et al., 2015
trans-2,2-dimethyl-3-hexene	0.335	0.005	0.845	0.024	Grosjean and Grosjean, 1997
trans-2,2-dimethyl-3-hexene	0.37	0.01	0.602	0.007	Braure et al., 2015
3-methyl-2-isopropyl-1-butene	0.607	0.077	0.425	0.029	Grosjean and Grosjean, 1997
2,4,4-trimethyl-2-pentene	0.187	0.01	0.839	0.04	Grosjean and Grosjean, 1997
2,3,4-trimethyl-2-pentene	0.44	0.01	0.78	0.01	Newland et al., 2020
1-decene	0.529	0.014	0.492	0.012	Grosjean and Grosjean, 1997
cis-5-decene	1.208	0.033	NA	NA	Grosjean and Grosjean, 1997
trans-5-decene	1.093	0.057	NA	NA	Grosjean and Grosjean, 1997
3,4-diethyl-2-hexene	0.705	0.041	0.287	0.034	Grosjean and Grosjean, 1997

## Sheet: Polyalkenes
NOTE: carbonyl2 is the most substituted carbonyl product
molecule	measured carbonyl1 yield	absolute error carbonyl1	measured carbonyl2 yield	absolute error carbonyl2	reference	notes
ocimene	0.21	0.04	-	-	Reissell et al., 1999
ocimene	0.24	0.04	0.33	0.06	Reissell et al., 2002
myrcene	0.22	0.01	-	-	Reissell et al., 1999
myrcene	0.26	0.04	-	-	Reissell et al., 1999	Note reported value (0.33) superceded by value given in Reissell et al., 2002 - see Reissell et al., 2002 Table 1
myrcene	0.25	0.06	-	-	Orlando et al., 2000
myrcene	0.21	0.03	0.7	0.13	Reissell et al., 2002
myrcene	0.23	-	-	-	Lee et al., 2006
terpinolene	-	-	0.4	0.06	Hakola et al., 1994
terpinolene	0.5	0.05	0.4	0.08	Reissell et al., 1999
terpinolene	0.5	0.06	-	-	Orlando et al., 2000
terpinolene	0.44	-	-	-	Lee et al., 2006
terpinolene	-	-	0.45	0.05	Ma and Marston, 2009
isoprene: MACR	-	-	0.42	0.06	Nguyen et al., 2016
isoprene: MACR	-	-	0.32	0.04	Rickard et al., 1999
isoprene: MACR	-	-	0.39	0.03	Aschmann and Atkinson, 1994
isoprene: MACR	-	-	0.32	0.05	Ren et al., 2017
isoprene: MVK	-	-	0.18	0.06	Nguyen et al., 2016
isoprene: MVK	-	-	0.13	0.02	Rickard et al., 1999
isoprene: MVK	-	-	0.16	0.013	Aschmann and Atkinson, 1994
isoprene: MVK	-	-	0.11	0.05	Ren et al., 2017
isoprene: HCHO	0.81	0.16	-	-	Nguyen et al., 2016
isoprene: HCHO	0.9	0.02	-	-	Ren et al., 2017
isoprene: HCHO	0.9	-	-	-	Grosjean et al., 1993
1,3-butadiene	-	-	0.52	0.06	Kramp and Paulson, 2000
1,3-butadiene	-	-	0.51	-	Niki et al., 1983

## Sheet: Exocyclic alkenes
NOTE: carbonyl2 is the most substituted carbonyl product
molecule	measured carbonyl1 yield	absolute error carbonyl1	measured carbonyl2 yield	absolute error carbonyl2	reference
vinylcyclohexane	0.47	0.04	0.62	0.03	Grosjean and Grosjean, 1997
methylenecyclohexane	-	-	0.19	0.01	Hasson et al., 2001b
camphene	-	-	0.36	0.06	Hakola et al., 1994
camphene	-	-	0.42	0.04	Hasson et al., 2001b
b-pinene	0.42	-	0.22	-	Grosjean et al., 1993
b-pinene	-	-	0.23	0.05	Hakola et al., 1994
b-pinene	-	-	0.23	0.09	Rickard et al., 1999
b-pinene	-	-	0.164	-	Yu et al., 1999
b-pinene	0.65	0.04	0.16	0.04	Winterhalter et al., 2000
b-pinene	-	-	0.26	0.01	Hasson et al., 2001b
b-pinene	0.65	-	0.17	-	Lee et al., 2006
b-pinene	-	-	0.16	0.03	Ma and Marston, 2008
sabinene	-	-	0.5	0.09	Hakola et al., 1994
sabinene	-	-	0.466	-	Yu et al., 1999
sabinene	0.52	0.09	0.35	0.14	Chiappini et al., 2006

## Sheet: Oxygenated alkenes
NOTE: carbonyl2 is the most substituted carbonyl product
molecule	measured carbonyl1 yield	absolute error carbonyl1	measured carbonyl2 yield	absolute error carbonyl2	reference
methacrolein	0.66	0.04	-	-	Ren et al., 2017
methacrolein	0.12	0.03	0.58	0.06	Grosjean et al., 1993
2-ethyl acrolein	-	-	0.14		Grosjean et al., 1994
2-ethyl acrolein	-	-	0.49	0.03	O'Dwyer et al., 2010
methyl vinylketone	0.44	0.05	-	-	Ren et al., 2017
methyl vinylketone	0.05	-	0.87	0.05	Grosjean et al., 1993
ethyl vinylketone	0.55	-	0.44	-	Grosjean et al., 1996
ethyl vinylketone	0.37	-	0.49	-	Kalalian et al., 2020
4-hexen-3-one	0.51	0.01	0.56	0.02	Grosjean and Grosjean, 1999
3-methyl-3-buten-2-one	0.44	0.05	0.3	0.03	Wang et al., 2015
3-methyl-3-penten-2-one	0.61	0.07	0.39	-	Wang et al., 2015
2-butenal	0.42	-	0.47		Grosjean and Grosjean, 1997
trans-2-hexenal	0.56	-	0.53	-	Grosjean et al., 1996
methyl vinyl ether	0.278	0.066	0.735	0.075	Klotz et al., 2004
ethyl vinyl ether	0.19	0.03	0.87	0.05	Thiault et al., 2002
ethyl vinyl ether	0.487	0.052	0.388	-	Grosjean and Grosjean, 1999
ethyl vinyl ether	0.15	0.04	0.8	0.08	Al Mulla et al., 2010
propyl vinyl ether	0.129	0.04	0.89	0.114	Zhou et al., 2006
butyl vinyl ether	0.101	-	0.776	-	Barnes et al., 2005
butyl vinyl ether		-	0.785	0.088	Zhou, 2007
ethyl propenyl ether	0.117	-	0.831	-	Barnes et al., 2005
ethyl propenyl ether	0.353	-	0.433	-	Grosjean and Grosjean, 1999
ethyleneglycol divinyl ether	0.47	0.04	0.5	0.04	Al Mulla et al., 2010
methyl acrylate	0.45	0.07	0.53	0.08	Bernard et al., 2010
methyl acrylate	0.55	0.04	0.4	0.01	Grosjean and Grosjean, 1997
ethyl acrylate	0.43	0.01	0.3	0.06	Bernard et al., 2010
methyl methacrylate	0.69	0.01	0.55	0.02	Bernard et al., 2010
vinyl acetate	0.3	0.04	0.7	0.08	Al Mulla et al., 2010
vinyl acetate	0.2	0.06	0.97	0.08	Picquet-Varrault et al., 2010
acrylic acid	1.48	0.2	0.1	-	Al Mulla et al., 2010
methacrylic acid	0.77	0.07	0.74	0.1	Al Mulla et al., 2010
2-propen-1-ol	0.6	0.03	0.57	0.03	Le Person et al., 2009
1-penten-3-ol	0.49	0.02	0.46	0.03	O'Dwyer et al., 2010
1-penten-3-ol	0.62	0.12	0.46	0.1	Kalalian et al., 2020
z-2-penten-1-ol	0.43	0.04	0.39	0.03	O'Dwyer et al., 2010
z-2-penten-1-ol	0.56	0.14	0.4	0.1	Kalalian et al., 2020
e-3-hexen-1-ol	0.63	0.08	0.43	0.1	Kalalian et al., 2020
3-methyl-2-buten-1-ol	0.56	0.05	0.19	0.02	Grosjean and Grosjean, 1999
linalool	0.21	-	0.85	0.14	Shu et al., 1997
linalool	0.16	-	-	-	Lee et al., 2006

## Sheet: Aromatic alkenes
NOTE: carbonyl2 is the most substituted carbonyl product
molecule	measured carbonyl1 yield	absolute error carbonyl1	measured carbonyl2 yield	absolute error carbonyl2	reference
styrene	0.34	0.05	0.64	0.07	Grosjean and Grosjean, 1997
